# Supplementary material for: 3D surface properties of glacier penitentes over an ablation season, measured using a Microsoft Xbox Kinect
Source: Copernicus journal article supplement (doi:10.5194/tc-2015-207), 2016-01-19
Supplement: Supplementary file [file tc-2015-207-AC1-supplement.pdf]

## Response to comments from reviewer 1

---

We would like to thank Renji Naruse for the comments on our manuscript and suggested improvements.

The review called for considerable rewriting of the manuscript to improve the clarity of purpose of the study, and we have made every effort to do this, as detailed below. In particular we focused on clearly stating the purpose, and improving the readability, and believe that the changes detailed below have significantly improved the manuscript.

Reviewer comments are given in green, authors reply in black and revised text sections included in blue italics. The revised manuscript and figure captions are appended to this reply highlighting all changes made, and including updated versions of the figures.

---

The purpose of this paper is unclear, and the manuscript itself is quite long with lots of lengthy paragraphs and sentences (e.g., L74-78, L79-84, L111-114, and others: very hard to read).

The aims of the paper have been stated more clearly at the end of the introduction as follows:

*"In this study a Microsoft Xbox Kinect sensor is used as a close-range mobile distance ranger to produce a series of small-scale digital surface models (DSMs). The method of DSM generation is evaluated against standard terrestrial laser scanning and the Kinect-derived DSMs of the penitentes are used to (i) perform the first detailed examination of the morphometry of natural penitentes over the course of an ablation season; (ii) compare the volume change computed from DSM differencing with estimates based on manual measurements of surface lowering and (iii) examine the geometrical roughness properties of the sampled penitentes."*

The sequencing of the results and discussion has also been reordered to follow the numerical order of these 3 aims.

The manuscript has been re-edited to break long sentences into shorter ones to aid readability. As illustration, the first two examples listed have been changed as follows (the third section has been deleted):

- *"While penitentes are a relatively rare form of linearized surface feature in many glacierized environments, in contrast linear crevasses are widespread, and although the impact of wind direction on roughness and the resultant turbulent heat fluxes is generally not treated in glaciology, penitentes offer a unique test bed for investigating the significance of linearized features on effective surface roughness for various wind directions."* Now reads: *"While penitentes are a relatively rare form of linearized surface feature in many glacierized environments, linear crevasses are widespread, and penitentes offer a unique test bed for investigating the significance of linearized features on effective surface roughness for various wind directions."*
- *"In general, the physical roughness of snow and ice surfaces are particularly prone to varying in space and time (e.g. Smeets et al., 1999; Brock et al., 2006; Fassnacht et al., 2009), it is desirable to be able to replace relatively logistically and technologically challenging methods of determining roughness parameters from atmospheric profile or eddy covariance measurements, with methods based on more readily measurable surface terrain properties (e.g. Kondo and Yamazawa, 1986; Munro, 1989; Andreas, 2011), or properties such as radar backscatter that can be derived from spaceborne instruments (e.g. Blumberg and Greeley, 1993)."*

now reads *“As it is logistically challenging to deploy instrumentation to determine roughness parameters from atmospheric profile or eddy covariance measurements on glacier surfaces, efforts have been made to instead use methods based on properties such as radar backscatter (e.g. Blumberg and Greeley, 1993) or more readily measurable surface terrain properties (e.g. Kondo and Yamazawa, 1986; Munro, 1989; Fassnacht et al., 2009a; Andreas, 2011).”*

Abstract should state in principle very concisely, the purpose (in a short sentence), methods, results (findings), interpretations (discussion), and conclusions within one paragraph of 200-300 words. In the present manuscript, the first nine lines (L10-L18) may be moved to Introduction, and the last 12 lines (L27-L39) emphasizes only aerodynamic roughness parameters.

Thanks for this; we fully agree that the initial abstract was not of sufficient brevity, or clarity. However, it remains the case that half of the abstract still refers to surface roughness as this part of the analysis is harder to condense than the morphometrical observations. The abstract has now been significantly reduced in length (from 492 to 364 words) following the suggestions and now reads as follows: *“In this study, the first small-scale digital surface models (DSMs) of natural penitentes on a glacier surface were produced using a Microsoft Xbox Kinect sensor on Tapado Glacier, Chile (30°08’S; 69°55’W). The surfaces produced by the complete processing chain were within the error of standard terrestrial laser scanning techniques, but insufficient overlap between scanned sections that were mosaicked to cover the sampled areas can result in three-dimensional positional errors of up to 0.3 m. Between November 2013 and January 2014 penitentes become fewer, wider, deeper, and the distribution of surface slope angles becomes more skewed to steep faces. Although these morphological changes cannot be captured by manual point measurements, mean surface lowering of the scanned areas was comparable to that derived from manual measurements of penitente surface height at a minimum density of 5 m<sup>-1</sup> over a 5 m transverse profile. Roughness was computed on the 3D surfaces by applying two previously published geometrical formulae; one for a 3D surface and one for single profiles sampled from the surface. Morphometric analysis shows that skimming flow is persistent over penitentes, providing conditions conducive for the development of a distinct microclimate within the penitente troughs. For each method a range of ways of defining the representative roughness element height was used, and the calculations were done both with and without application of a zero displacement height offset to account for the likelihood of skimming air flow over the closely-spaced penitentes. The computed roughness values are in the order of 0.01-0.10 m during the early part of the ablation season, increasing to 0.10-0.50 m after the end of December, in line with the roughest values previously published for glacier ice. Both the 3D surface and profile methods of computing roughness are strongly dependent on wind direction. However, the two methods contradict each other in that the maximum roughness computed for the 3D surface coincides with airflow across the penitente lineation while maximum roughness computed for sampled profiles coincides with airflow along the penitente lineation. These findings highlight the importance of determining directional roughness and wind direction for strongly aligned surface features and also suggest more work is required to determine appropriate geometrical roughness formulae for linearized features.”*

As expressed in the first part of Introduction (L41-L60), it is known that sublimation from the tips of penitentes and concentrated solar radiation in the hollows are essential to the formation of penitentes. On the other hand, turbulent heat flux, which is related with aerodynamic roughness heights, may play negative roles for penitent developments. In Introduction, following the albedo effect (L63-69), roughness parameters are described in detail from L70 to L96.

The section about methods of determining surface roughness has been moved to the methods section immediately prior to introducing the geometrical approach applied in this work. This makes the introduction more streamlined and is both more in balance with, and leads the reader more smoothly to, the goals of the paper.

I guess that the authors' largest interest may be the derivation and properties of roughness parameters. If so, the structure and the way of writing should be significantly modified in order for readers to understand easily the authors' statements. Issues on the penitent morphology and the aerodynamic roughness are not well harmonized in the present paper. Thus, I suggest now to divide the manuscript into two papers, such as, for example (only for authors' information):

a) "3D surface properties of snow penitentes and their evolutions in an ablation season 2013-14, at Tapado Glacier in the Andes" - [Fig.1, Fig.4, Fig.10, Fig. (meteorological condition), Fig. (heat balance) ]

b) "Aerodynamic roughness parameters over a field of glacier penitentes derived from measurements with a Microsoft Xbox Kinect" - [Fig.1, Fig.2, (Fig.3), Figs. 5, 6, 7, 8, (9) ] The manuscript b) needs to be reviewed by (an) expert(s) on boundary layer micrometeorology.

We prefer not to separate the paper into two, as the surface roughness properties fall under the umbrella of the 'surface properties' covered by the title. Additionally, we are keen to include within this paper at least one way in which the surfaces generated by the Kinect scanning can have valuable scientific applications.

However we have tried to respond to the comment that the component parts needed to be better integrated than they were in the initial submission and accordingly a number of changes were made to improve the relationship between the morphology and the roughness parts of the paper. For example:

- L67: "Measurements of natural penitentes required to examine their morphometry and roughness are rare (e.g. Naruse and Leiva, 1997), and ..."
- L75: clearly stated the threefold aims "... are used to (i) perform the first detailed examination of the morphometry of natural penitentes over the course of an ablation season; (ii) compare the volume change computed from DSM differencing with estimates based on manual measurements of surface lowering and (iii) examine the geometrical roughness properties of the sampled penitente surfaces."
- These aims are now tackled consistently in this order throughout the paper.
- In keeping with this order, Figure 10 was moved up the order to become Figure 5.
- L470: "*The changing morphometry of the penitentes alters the geometrical surface roughness as they develop over the ablation season.*"

# 3D surface properties of glacier penitentes over an ablation season, measured using a Microsoft Xbox Kinect.

~~L~~Lindsey. I. Nicholson<sup>1</sup>, ~~M~~Michał. Pełlicki<sup>2,3</sup>, ~~B~~Ben. Partan<sup>4</sup>, and ~~S~~Shelley. MacDonell<sup>3</sup>

<sup>1</sup> Institute of Atmospheric and Cryospheric Sciences, University of Innsbruck, Innsbruck, Austria

<sup>2</sup> Institute ~~for~~of Geophysics, Polish Academy of Sciences, ul. Księcia Janusza 64, 01-452 Warsaw, Poland

<sup>3</sup> Centro de Estudios Avanzados en Zonas Áridas (CEAZA), La Serena, Chile

<sup>4</sup> University of Maine, Orono, USA

~~Correspondance~~Correspondence to: L. I. Nicholson (lindsey.nicholson@uibk.ac.at)

~~**Abstract.** Penitentes are a common feature of snow and ice surfaces in the semi arid Andes where very low humidity, in conjunction with persistently cold temperatures and sustained high solar radiation favour their development during the ablation season. As penitentes occur in arid, low latitude basins where cryospheric water resources are relatively important to local water supply, and atmospheric water vapor is very low, there is potential value in understanding how penitentes might influence the runoff and atmospheric humidity.~~

~~The complex surface morphology of penitentes makes it difficult to measure the mass loss occurring within them because the (i) spatial distribution of surface lowering within a penitente field is very heterogeneous, and (ii) steep walls and sharp edges of the penitentes limit the line of sight view for surveying from fixed positions and (iii) penitentes themselves limit access for manual measurements. In this study, we solved these measurement problems by using a Microsoft Xbox Kinect sensor to generate the first small-scale digital surface models (DSMs) of small sample areas of snow and ice natural penitentes on a glacier surface were produced using a Microsoft Xbox Kinect sensor on Tapado Glacier in Chile (30°08'S; 69°55'W) between November 2013 and January 2014. The surfaces produced by the complete processing chain were within the error of standard terrestrial laser scanning techniques. However, in our study, but insufficient overlap between scanned sections that were mosaicked to cover the studied sites sampled areas can result in three-dimensional positional errors of up to 0.3 m.~~

~~Mean surface lowering of the scanned areas was comparable to that derived from point sampling of penitentes at a minimum density of 5 m<sup>-1</sup> over a 5 m transverse profile. Over time the Between November 2013 and January 2014 penitentes become fewer, wider, deeper, and the distribution of surface slope angles becomes more skewed to steep faces. These Although these morphological changes cannot be captured by the interval sampling by manual point measurements, mean surface lowering of the scanned areas was comparable to that derived from manual measurements of penitente surface height at a minimum density of 5 m<sup>-1</sup> over a 5 m transverse profile. Roughness was computed on the 3D surfaces by applying two previously published geometrical formulae; one for a 3D surface and one for single profiles sampled from the surface. Morphometric analysis shows that skimming flow is persistent over penitentes, providing conditions conducive for the development of a distinct microclimate within the penitente troughs. For each method a range of ways of defining the representative roughness element height required by these formulae was used, and the calculations were done both with and without using application of a zero displacement height offset to account for the likelihood of skimming air flow over the closely spaced penitentes. The computed roughness values are in the order of 0.01-0.10 m during the early part of the ablation season, increasing to 0.10-0.50 m after the end of December, in line with the roughest values previously published for glacier ice. Both the 3D surface and profile methods of computing roughness are strongly dependent on wind direction. However, the two methods contradict each other in that the maximum roughness computed for the 3D surface coincides with airflow across the penitente lineation while maximum roughness computed for sampled profiles coincides with airflow along the penitente lineation. These findings highlight the importance of determining directional roughness and wind~~



43 direction for strongly aligned surface features and also suggest more work is required to determine appropriate  
44 geometrical roughness formulae for linearized features.

## 45 1. Introduction

46 Penitentes are spikes of snow or ice, ranging from a few centimetres up to several metres in height that can form  
47 during the ablation season on snowfields and glaciers ~~under the right conditions. The conditions required for~~  
48 ~~penitentes to form. They are dew point below 0°C, persistently low air temperatures and sustained strong solar~~  
49 ~~insolation (Liboutry, 1954). These conditions are frequently met at a common feature of~~ high elevation, low-latitude  
50 glaciers and snowfields, ~~such as in the subtropical Andes~~ (e.g. Hastenrath and Koci, 1981; Corripio and Purves,  
51 2005; Winkler et al., 2009) where ~~penitentes are widespread during the ablation~~ very low humidity, persistently  
52 cold temperatures and sustained high solar radiation favour their development (Liboutry, 1954). As cryospheric  
53 water resources are relatively important to local dry season— water supply in arid mountain ranges (Kaser et al.,  
54 2010), there is potential value in understanding how penitentes might influence both runoff and atmospheric  
55 humidity.

56 ~~Observations show that penitente~~ Penitentes form linearized, inclined fins of snow or ice on the surface. Both the  
57 latitudinal range (within 55° of the equator on horizontal surfaces) and geometry is (aligned with the arc of the sun  
58 across the sky, and tilted toward the sun at local noon, ~~highlighting the importance~~) of penitentes are governed by  
59 ~~solar radiation in penitente formation to surface geometry~~ (Liboutry, 1954; Hastenrath and Koci, 1981; Bergeron et  
60 al., 2006). ~~Indeed, the alignment and restricted latitudinal range of penitentes (within 55° of the equator on~~  
61 ~~horizontal surfaces) can be explained by solar to surface geometry alone~~ (Cathles et al., 2014). ~~The process~~ During  
62 the initial stages of penitente growth involves geometric focusing of incident solar radiation development, ablation is  
63 thought to proceed by surface sublimation alone driven by the low atmospheric humidity. Surface irregularities that  
64 causes focus reflected solar radiation within depressions ~~to receive more radiation than surrounding peaks~~ (Amstutz,  
65 1958; Corripio and Purves, 2005; Lhermitte et al., 2014; Claudin et al., 2015). ~~Consequently,~~ such that the energy  
66 receipts, and consequently ablation, are initially enhanced in the hollow due to multiple reflection of irradiance,  
67 and the surface irregularity becomes amplified. However for substantial penitente growth it is crucial that, at the tips of  
68 penitentes, ablation occurs by sublimation and the snow/ice temperature remains below the melting point, while in  
69 the troughs between penitentes, melting can occur once Subsequently, as the surface relief increases, a more humid  
70 microclimate is ~~established within the hollow~~ thought to develop in the hollows between penitentes, suppressing  
71 sublimation and allowing melting in the depressions. Meanwhile, the penitentes tips continue to ablate by  
72 sublimation alone (Liboutry, 1954; Drewry, 1970; Claudin et al., 2015). ~~Once the snow/ice in the hollows has~~  
73 ~~reached the melting point, the spatial differentiation of ablation processes serves to further amplify the penitente~~  
74 ~~relief as melting only) and, as melting requires approximately an eighth of the energy of sublimation to remove the~~  
75 ~~same amount of ice, the spatial differentiation of ablation process between penitente trough and tip is very effective~~  
76 at amplifying the penitente surface relief.

77 The altered partitioning of ablation between sublimation and melting that occurs in penitente fields, as compared to  
78 surfaces without penitentes (e.g. Liboutry, 1998; Winkler et al., 2009; Sinclair and MacDonell, 2015) ~~The impact of~~  
79 ~~penitentes on the surface energy balance and ablation of snow and ice is of interest in arid mountains catchments,~~  
80 ~~where penitentes are widespread and meltwater can be a substantial contribution to local hydrological resources~~  
81 ~~(Kaser et al., 2010). Previous studies have shown that penitentes alter the surface energy balance of snow and ice~~  
82 ~~surfaces by reducing), is expected to alter the rate of mass loss and meltwater production of snow and icefields~~  
83 ~~during the ablation season, but this has not yet been fully quantified. Previous studies, based on modelling idealized~~  
84 ~~penitente surfaces, have investigated the impact of penitentes on the shortwave radiative balance, and suggest that~~  
85 ~~penitentes reduce~~ effective albedo by up to 40% compared to flat surfaces (Warren et al, 1998; Corripio and Purves,  
86 2005; MacDonell et al., 2013; Cathles et al., 2014; Lhermitte et al., 2014) ~~as well-). In addition to altering the~~  
87 ~~partitioning of ablation between sublimation and melting (e.g. Liboutry, 1998; Winkler et al., 2009; Sinclair and~~

88 ~~MacDonell, 2015). Thus, the presence of penitentes is expected to alter the rate of mass loss and meltwater~~  
89 ~~production of snow and icefields during the ablation season, and, on the basis of the radiative balance it has been~~  
90 ~~postulated that they will accelerate the snow and ice mass loss rates (Cathles et al., 2014). However properties of the~~  
91 ~~surface, the development of penitentes on the surface will also alter the roughness properties in both space and time,~~  
92 ~~but this, as well as its impact on the resultant turbulent fluxes is not quantified. The wind direction dependence of~~  
93 ~~manifestly alters the surface roughness properties, but neither the impact of penitentes on surface roughness, nor the~~  
94 ~~associated impact on turbulent energy fluxes has been investigated. The roughness of snow and ice surfaces is~~  
95 ~~particularly prone to varying in space and time (e.g. Smeets et al., over linearized surface features has been~~  
96 ~~previously observed in wind 1999; Brock et al., 2006; Fassnacht et al., 2009b). Wind profile measurements over~~  
97 ~~snow linearized sastrugi, for which surface features shows that the derived aerodynamic roughness length varied~~  
98 ~~from 1–70 mm over a 120° range of impinging wind direction (Jackson and Carol Carroll, 1978). While penitentes~~  
99 ~~are a relatively rare form of linearized surface feature in many glacierized environments, in contrast, linear crevasses~~  
100 ~~are widespread, and although the impact of wind direction on roughness and the resultant turbulent heat fluxes is~~  
101 ~~generally not treated in glaciology, penitentes offer a unique test bed for investigating the significance of linearized~~  
102 ~~features on effective surface roughness for various wind directions.~~

103 ~~In general, the physical roughness of snow and ice surfaces are particularly prone to varying in space and time (e.g.~~  
104 ~~Smeets et al., 1999; Brock et al., 2006; Fassnacht et al., 2009), it is desirable to be able to replace relatively~~  
105 ~~logistically and technologically challenging methods of determining roughness parameters from atmospheric profile~~  
106 ~~or eddy covariance measurements, with methods based on more readily measurable surface terrain properties (e.g.~~  
107 ~~Kondo and Yamazawa, 1986; Munro, 1989; Andreas, 2011), or properties such as radar backscatter that can be~~  
108 ~~derived from spaceborne instruments (e.g. Blumberg and Greeley, 1993). The most comprehensive surface of~~  
109 ~~methods to determine apparent aerodynamic properties from surface morphometry was carried out by Grimmond~~  
110 ~~and Oke (1999) who tested several methods in urban environments, which are among the roughest surface~~  
111 ~~conditions encountered in boundary layer atmospheric studies. The morphometric estimates of roughness properties~~  
112 ~~were compared with those from aerodynamic methods from numerous field and laboratory studies. Many of the~~  
113 ~~aerodynamic studies were found to be flawed, and the study demonstrates that, despite the considerable effort in~~  
114 ~~obtaining such measurements, their reliability in complex and rough terrain is contested as the computations rely~~  
115 ~~upon theory that is developed for flat homogenous terrain, and in general the aerodynamic results show a similar~~  
116 ~~amount of spread as the various geometrical methods tested. Although, Grimmond and Oke (1999) consider that~~  
117 ~~direct measurements of fluxes over complex terrain are most likely the ‘best’ way of determining surface properties,~~  
118 ~~the difficulties of deploying the expensive and relatively delicate instruments over glacier surfaces makes a~~  
119 ~~geometric determination even more appealing. However, in the case of penitentes, such studies are impeded by a~~  
120 ~~scarcity of information on real penitente geometry.~~

121 ~~Measurements of natural penitentes (e.g. required to examine their morphometry and roughness are rare (e.g. Naruse~~  
122 ~~and Leiva, 1997) are rare as they are generally found in relatively inaccessible areas and the complex surface relief~~  
123 ~~poses a considerable impediment to movement and measurement, for example preventing), and difficult to obtain~~  
124 ~~because the complex, and partially overhanging, surface prevents the use of simplified automated tools such as~~  
125 ~~photogrammetric determination of surface profile heights (e.g. Fassnacht et al., 2010 2009a; Manninen et al., 2012).~~  
126 ~~Furthermore, accurately measuring the convoluted penitente surface is in itself a significant challenge, as it includes~~  
127 ~~overhanging surfaces, which is problem for immobile) or line-of-sight surveying equipment. However, from fixed~~  
128 ~~positions. Recent advances in close-range mobile depth-of-field sensors and efficient feature tacking software used~~  
129 ~~in interactive computer gaming offer potentially useful tools that can be applied to generate small-scale digital~~  
130 ~~surface models to resolve such problems in earth science (e.g. Mankoff et al., and Russo, 2013). In this study sample~~  
131 ~~plots of penitentes in snow on a glacier surface are scanned using a Microsoft Xbox Kinect sensor is used as a close-~~  
132 ~~range mobile distance ranger to produce a series of small-scale digital surface models (DSMs). These surface~~  
133 ~~models are used to perform (i) The method of DSM generation is evaluated against standard terrestrial laser~~  
134 ~~scanning, and the Kinect-derived DSMs of the penitentes are used to (i) perform the first detailed examination of the~~

135 ~~geometry~~morphometry of natural penitentes ~~and how they change~~ over the course of ~~the core~~an ablation season; (ii)  
136 ~~an examination of the geometrical roughness properties of penitentes and (iii) compare the volume~~ changes~~change~~  
137 computed from DSM differencing ~~the DSMs with the volume changes estimated from~~estimates based on manual  
138 measurements of surface lowering ~~within a penitente field. These measurements enable evaluation of how accurately~~  
139 ~~simplified~~and (iii) examine the geometrical roughness properties of the sampled penitente surfaces ~~used in~~  
140 ~~theoretical modelling represent the true surfaces found in nature, improved parameterization of surface roughness in~~  
141 ~~energy balance models applied to glacier and snowfields with penitentes, and the performance of energy balance~~  
142 ~~models over penitente surfaces to be evaluated against mas loss derived from the measured surface changes.~~

## 143 2. Methods

### 144 2.1 Description of fieldsite

145 Tapado Glacier (30°08'S; 69°55'W) lies in the upper Elqui Valley of the semi-arid Andes of the Coquimbo Region  
146 of Chile (Figure 1). ~~This~~The glacier is relatively easily-accessible and ~~previous research indicates that the glacier~~  
147 ~~surface develops is known to develop~~ penitentes every summer (Sinclair and MacDonell, 2015). Two separate study  
148 areas were analysed. Firstly, a test site was established at a patch of snow penitentes within a dry stream bed at 4243  
149 m a.s.l. in the glacier foreland (Figure ~~1b~~1). This site was used to (i) ~~trial~~test instrumental setups in order to optimize  
150 the field operation of the Kinect sensor, and (ii) compare the performance of the Kinect sensor against a Terrestrial  
151 Laser ~~Scanning Scanner~~ (TLS)~~system~~. This location was chosen due to the logistical difficulties of transporting the  
152 TLS to the glacier. Subsequently, two study plots were established at an elevation of 4774 m a.s.l. ~~within~~on the  
153 glacier ablation zone ~~(Figure 1)~~. These ~~surfaces at these~~ sites were ~~measured~~scanned repeatedly ~~using~~with the Xbox  
154 Kinect (see section 2.3) during the core ablation season between the end of November 2013 and the beginning of  
155 January 2014. ~~An automatic weather station on a free-standing tripod was installed beside the two plots to provide~~  
156 ~~meteorological context for the measurements.~~

157 The location and layout of the two glacier sites is shown in Figure ~~1a~~1a. Site A (5 m by 2 m) was measured four  
158 times, on 25 November, 11 December, 20 December and 3 January. Site B (2 m by 2 m, ~~Figure 1e~~) was only  
159 measured on the last three dates ~~(Figure 1e)~~. The corners of the study sites were marked with 2 m lengths of plastic  
160 plumbing piping hammered vertically into the snow, or drilled into the ice ~~(Figure 1c)~~. In order to locate the study  
161 sites in space and to provide a common reference ~~frame~~ for each survey date, marker stake positions were measured  
162 using a Trimble 5700 differential GPS with Zephyr antenna on the 25th November, with a base station in the glacier  
163 foreland. On each visit to the glacier, when possible, the stakes were hammered further into the snow and the  
164 resultant lowering of the stake top was noted. The maximum standard deviations of the GPS stake positions were  
165 < 1.0 cm, 1.1 cm and 1.7 cm in easting, northing and elevation respectively, with combined XYZ standard deviation  
166 < 2.0 cm for all stakes (Supplement A). Error on the manual measurements of height offsets of the marker stakes on  
167 subsequent survey dates is conservatively estimated to be 2.0 cm. This results in total positional errors of the ground  
168 control points at each scan date of between 2.3 and 2.7 cm depending on the stake. Manual measurements of surface  
169 lowering were made along the eastern long side of site A. All surfaces heights were referenced to the elevation of  
170 the glacier surface at the upglacier end of this cross profile at the date of installation. An automatic weather station  
171 (AWS) on a free-standing tripod was installed beside the two glacier plots to provide meteorological context for the  
172 measurements (Figure 1).

### 173 2.2 Terrestrial laser scanning

174 ~~Surface scans of snow penitentes at~~At the test site ~~were undertaken with both a terrestrial laser scanner (TLS) and~~  
175 ~~the Kinect sensor in order to compare the~~ surface scans produced by the ~~well-established TLS method and the~~  
176 relatively new Kinect sensor ~~application~~were compared with those produced by the well-established TLS method.  
177 The TLS system used was an Optech ILRIS-LR scanner, which is a long-range terrestrial laser scanner especially

178 | suitable for surveying snow and ice surfaces ~~thanks to as it has~~ a shorter wavelength laser beam (1064 nm) than other  
179 | models. This equipment surveys surface topography based on time-of-flight measurement of a pulsed laser beam  
180 | reflected to a given angle by a system of two rotating mirrors. It has a raw range accuracy of 4 mm at 100 m  
181 | distance, raw angular accuracy of 80  $\mu$ rad, beam diameter of 27 mm at 100 m distance and beam divergence of 250  
182 |  $\mu$ rad. The instrument was placed in five locations around the surveyed snow patch and boulder, overlooking it from  
183 | different directions. Positions of the TLS were measured with ~~the~~ Trimble 5700 differential GPS with Zephyr  
184 | ~~antenna~~ antennae in static mode. Seventeen point clouds were obtained with nominal resolution of 0.11-0.75 cm.  
185 | Resulting point clouds were corrected for atmospheric conditions (pressure, temperature and humidity) and trimmed  
186 | with ILRIS Parser software, aligned with Polyworks IMAAlign software into a common local coordinate system and  
187 | georeferenced with differential GPS measurements using Polyworks IMInspect software. The alignment error of the  
188 | point clouds as estimated by this software is 0.36-0.87 cm and comparison with ground control points gives an error  
189 | of 5.65 cm. The TLS scan of the snow penitentes is presented as an example of the nature of the DSM that can be  
190 | obtained within a penitente field using TLS (Figure 2). Unfortunately, the scans of snow penitentes could not be  
191 | carried out with both the TLS and Kinect on the same day, so direct comparison of the TLS and Kinect scans is  
192 | instead performed on a reference boulder ~~lying on the ground beside~~ within the test site, whose surface is assumed  
193 | unchanged between different scan dates. ~~The TLS scan of the snow penitentes is presented as an example of the~~  
194 | ~~nature of the DSM that can be obtained within a penitente field using a TLS (Figure 2).~~

### 195 | 2.3 Kinect ~~scans of surface~~ changescanning

196 | The Kinect sensor emits a repeated pattern of structured infra-red (IR) beams, and records the pattern distortion with  
197 | an ~~onboard~~ IR camera. The depth-~~of-~~field calculation is performed via a proprietary algorithm and a distance map  
198 | is the raw data output. Using the standard calibration the static raw depth field resolution of the Kinect is 1 mm and  
199 | the ~~Kinect measured~~ distance ~~at the center of the field of view is within 1% of the real distance (Mankoff et al.,~~  
200 | ~~2013), implying an error of~~  $\epsilon$  is < 1.0 cm at the distance range of the penitente scans. (Mankoff and Russo, 2013).

201 | For its original gaming usage, the Kinect is in a fixed position and proprietary software uses feature tracking to track  
202 | the movements of players moving within the field of view of the Kinect. However, the inverse of this workflow can  
203 | also be applied ~~wherein~~ whereby the Kinect sensor is moved interactively around a static surface or 3D body, using  
204 | the same feature tracking to compute the position of the sensor relative to the object and thereby allowing a point  
205 | cloud reconstruction of the object ~~to be constructed.~~ In this work we apply the second work flow sampling and  
206 | sample Kinect data using the ReconstructMe™ 2.0 software package. In common with alternative reconstruction  
207 | packages that are compatible with the Kinect, ReconstructMe™ performs bilateral filtering on the output depth map  
208 | frame and converts the pixel version of each depth map frame to 3D coordinate maps of vertices and normals. An  
209 | iterative closest point (ICP) alignment algorithm is then applied frame by frame at three scales to repeatedly rotate  
210 | and translate the depth field to determine camera position and an aligned surface, giving weighted preference to  
211 | portions of the surface that are perpendicular to the line of sight. ~~This~~ The ReconstructMe™ software has the  
212 | advantage of producing surface meshes in real-time, so that the operator can ~~visibly~~ check the scan quality and  
213 | coverage at the time of capture, but the disadvantage that the raw point cloud is not saved and if the real-time  
214 | tracking is lost a new scan ~~sample~~ must be started.

215 | The Xbox Kinect was connected via a 5m powered USB extension cord to an MSI GE60 gaming laptop, powered  
216 | using a 240V 600W inverter connected to the ~~12V~~-160Ah 12V battery of the automatic weather station on the  
217 | glacier. Scans were carried out by two people; one moving the Kinect across the penitente field and the other  
218 | monitoring the quality of the surface being generated. ~~The on screen. In bright conditions, the~~ return IR signal of the  
219 | Kinect is swamped by natural radiation ~~in bright conditions, and this is especially true over bright, rough~~ over snow  
220 | and ice surfaces, which reflect ~~the~~ a high proportion of incident shortwave radiation, and absorb or scatter much of  
221 | the longwave radiation signal. ~~To solve this~~ Therefore, scanning was carried out at twilight or just after nightfall.  
222 | Sudden movements caused by the operator slipping or the snow compacting underfoot ~~can result~~ resulted in the

223 ReconstructMe software losing its tracking of common reference points ~~used to generate the continuous surface~~  
224 ~~mesh.~~ Consequently, each study site was scanned in small sections and three to thirteen ~~separate~~overlapping surface  
225 meshes were used to cover the area of each study site.

## 226 **2.4 Mesh processing**

227 ~~Freely available Meshlab software was used to initially align the Kinect surface meshes covering each study site~~  
228 ~~using a pairwise alignment procedure.~~ mesh processing

229 The full mesh processing procedure using the freely available Meshlab software is presented in Supplement B, and  
230 briefly described here. Small surface components, unreferenced and duplicated vertices were removed from the  
231 meshes using inbuilt filters. ~~The Meshlab alignment~~The component meshes that cover each sampling date at a single  
232 site were aligned using an iterative closest point (ICP) algorithm ~~was applied to objectively optimize the alignment~~  
233 ~~and compute~~which distributes the alignment error. ~~This alignment procedure uses an ICP algorithm to iteratively~~  
234 ~~align the component meshes and distribute the alignment errors~~ evenly across the resultant mosaicked surface mesh.  
235 Alignment solutions consistently had mean distributed error < 4 mm (Supplement B). The aligned meshes were  
236 flattened into a single layer, remeshed using a Poisson filter and ~~finally~~ resampled to reduce the point density by  
237 setting a minimum vertex spacing of 2.5mm.

238 The surface mesh for each scan date was georeferenced in Polyworks software using the known coordinates of the  
239 base of the marker stakes at the time of each scan because the upper portions of the symmetrical stakes are often  
240 poorly captured by the meshing software. The local elevation zero was set to be the north-east corner of site A. The  
241 mismatch evident in the georeferencing step (Table 1) is much larger than the mesh alignment error (Supplement B).  
242 ~~stakes are often poorly represented in the scans due to the fact that ReconstructMe™ does not handle symmetrical~~  
243 ~~objects well. It proved difficult in some cases to locate the surfaces in space such that the locations of all marker~~  
244 ~~stakes were consistent with the ground control points.~~ This is most likely an artifact of a combination of (i) reduced  
245 mesh quality at the margins of the component scans and (ii) insufficient overlap between some scan sections  
246 producing distortion within the mesh alignment. ~~The mismatch evident in the georeferencing step (Table 1) is much~~  
247 ~~larger than the mesh alignment error (Supplement B).~~

248 To eliminate the marker stakes and any data gaps near the margins of the study areas, each surface mesh was sub-  
249 sampled within the staked area. The sub-sampled area for site A is a 2.0 by 3.5 m horizontal area (7.00 m<sup>2</sup>), and site  
250 B is a 1.5 x 1.5 m horizontal area (2.25 m<sup>2</sup>) shown in the examples in Figure 3. Mesh vertices and an index file of  
251 the vertices comprising each face were exported from Meshlab for subsequent analysis in Matlab software.

## 252 **2.5 Calculations of surface geometrical properties**

253 The geo2d and geo3d toolboxes (available from the Matlab File Exchange) were used ~~in Matlab™~~ to compute the  
254 ~~triangle~~face areas and normals of the mesh. from which ~~the~~ surface height distribution, aspect and dip of the  
255 sampled surface ~~can be determined~~were calculated, weighted by the ~~triangleratio~~ratio of each face area ~~as a function of~~to  
256 the total surface area of all faces. ~~Volume change between~~As the surfaces ~~was contain overhanging parts, DSM~~  
257 ~~differencing cannot be performed by simple subtraction. Instead volumes for all surfaces were~~ computed by  
258 ~~projecting each triangle area onto relative to~~ a baselevel horizontal reference ~~surface.~~ Volumes relative to this  
259 horizontal reference for upward-facing triangles were computed column-wise ~~from these projected areas, by~~  
260 projecting the area of each triangular face onto the reference surface and using the height coordinate of the triangle  
261 centroid as the height dimension for each column. These were summed and volumes for overhanging triangles,  
262 calculated in the same way ~~as the up ward facing volumes,~~ were subtracted to derive ~~at~~he total volume between the  
263 reference surface and ~~the~~each scanned penitente surface. Successive volumes were subtracted to obtain the volume  
264 change over each measurement interval.



## 2-62.6 Manual measurements of surface change

Traditional single-point stake measurements of glacier surface lowering are unreliable within the inhomogeneous surface of a penitente field. One alternative is to measure surface lowering at intervals along a profile perpendicular to the main axis of alignment of the penitentes. Such a reference was installed along the 5 m-long eastern margin of site A, between two longer corner stakes drilled 3 m into the ice using a Kovacs hand drill. The distance between a levelled string and the glacier surface was measured using a standard tape measure at 0.2 m intervals on 23 November. Subsequent measurements, on the 12 and 21 December and on 4 January, were made at 0.1 m intervals. All measurements were recorded to the nearest centimetre, and the error on each measurement is estimated to be 2.0 cm, which is assumed to capture the error associated with the horizontal position of the measurements along the reference frame and the vertical measurements of the distance to the surface beneath.

## 2.7 Calculations of geometric surface roughness

The aerodynamic roughness length ( $z_0$ ) is the distance above the surface at which an extrapolation of a logarithmic windspeed profile under neutral conditions would be extrapolated down through towards the surface layer and would reach zero. Over taller roughness elements the level-of-action of momentum transfer between the airflow and the surface roughness elements is displaced upwards by a distance, termed the zero-plane displacement ( $z_d$ ). Above particularly rough surfaces, a roughness sub-layer is formed in the lowest part of the surface layer within which surface roughness elements create a complex 3D flow that is almost chaotic. Where roughness elements are widely spaced, the separated flow over obstacles reattaches to the surface before the subsequent obstacle is reached. More closely packed roughness elements experience a wake interference regime, and in the most densely packed arrays of roughness elements skimming flow occurs (Grimmond and Oke, 1999). At the top of the roughness sublayer individual wakes caused by surface obstacles are smeared out and the flow is independent of horizontal position, and thus, observations at this level represent the integrated surface rather than individual surface obstacles. This level is known as the blending height ( $z_b$ ). All these properties are dependent on the size and arrangement of surface roughness elements.

As it is logistically challenging to deploy instrumentation to determine roughness parameters from atmospheric profile or eddy covariance measurements on glacier surfaces, efforts have been made to instead use methods based on properties such as radar backscatter (e.g. Blumberg and Greeley, 1993) or more readily measurable surface terrain properties (e.g. Kondo and Yamazawa, 1986; Munro, 1989; Fassnacht et al., 2009a; Andreas, 2011). Grimmond and Oke (1999) tested several methods of determining apparent aerodynamic properties from surface morphometry in urban environments, which are among the roughest surface conditions encountered in the atmospheric boundary layer, and found that morphometric determinations of surface roughness do not clearly underperform in comparison with aerodynamic methods, suggesting that morphometric measurements of roughness are worth pursuing.

There are a number of formulations for deriving  $z_0$  from geometrical measurements. For example, the simplest approach is to take the standard deviation of the surface elevations as a measure of roughness (Thomsen et al., 2015). In this work, the surface meshes were analysed for roughness on the basis of a widely-used relationship established by Lettau (1969), initially developed for isolated, regular obstacles distributed over a plane:

$$z_0 = 0.5 h \left( \frac{s}{S} \right) \quad (1)$$

where  $h$  is the height of the obstacles,  $s$  is the upwind silhouette area of each obstacle and  $S$  is the specific area occupied by each roughness element obstacle, also referred to as its lot area. The roughness values computed using Equation 1 over 3D snow surfaces has been shown to vary widely depending on the methods of surface interpolation used (Fassnacht et al., 2014), due to the influence on interpolation method on the unit surface area occupied by each roughness element. However in this work the high resolution meshes used can be expected to adequately capture the

308 surface properties as no extrapolation or interpolation procedure is needed. Isolated roughness elements of regular  
309 geometry distributed over a horizontal plane are a poor analogy for the irregular surface topography of a penitente  
310 field, and the applicability of this formulation over penitentes has not been established. Nevertheless, we apply the  
311 analysis as an illustration of the nature of the results generated from such an approach over penitentes and hope that  
312 future aerodynamic roughness lengths obtained from micrometeorological measurements can be compared to these  
313 ~~geometrically-morphometrically~~-derived ones. Macdonald and others (1998) state that for irregular obstacles  $h$  can  
314 be replaced by average obstacle height,  $s$  with the sum of all the upwind silhouette areas, and  $S$  with the total area  
315 covered by the obstacles. While the upwind silhouette area, and indeed surface area in any direction, is relatively  
316 easily defined for each surface mesh area using trigonometry, it is difficult to define individual roughness elements  
317 and their representative heights, due to the lack of an apparent base level. Here we first detrend the surfaces to  
318 remove any general surface slope at the site, then compute the roughness for the detrended 3D meshes assuming that  
319 the roughness elements cover the whole surface area (i.e  $S = \text{plot area}$ ), and for four possible representations of  
320 average obstacle height ( $h$ ) as follows: (i) the maximum range of the detrended mesh; (ii) twice the standard  
321 deviation of the detrended surface mesh; (iii) mean mesh height above the mesh minimum; and (iv) median mesh  
322 height above the minimum.

323 These data are computed for illustrative purposes only as it is reported that Equation 1 fails when the roughness  
324 element density exceeds 20-30% (Macdonald et al., 1998), as is expected for penitente fields (Macdonald et al.,  
325 1998). High density roughness elements means that they interfere with the airflow around each other, and upwards  
326 displacement of the zero wind velocity level ~~is displaced upwards, and means that~~ effective roughness is a result of  
327 the roughness elements above this zero velocity displacement plane. ~~The, and the~~ zero displacement height ~~in this~~  
328 ~~sense~~, gives an indication of the penetration depth of effective turbulent mixing into the penitente field. Accordingly,  
329 we additionally present sample calculations of three-dimensional roughness on the detrended surface meshes using  
330 three possible realizations of  $z_d$ , as like  $h$ .  $z_d$  is also unknown in the case of the penitente fields being sampled. In  
331 the first case,  $z_d$  is taken to be  $h$ , in the second  $2/3 h$ , which is a widely used standard in forests and other complex  
332 terrain applications (BrutsaertBrutsaert, 1975), and in the third  $1/3 h$  ~~for comparison, both~~. Each  $z_d$  case is computed  
333 for the four realizations of  $h$  used as before. Equation 1, (for irregular obstacles) is then applied to the roughness  
334 elements remaining above the plane of the general surface slope offset by a distance  $z_d$  above the minimum height of  
335 the surface mesh. The representative height  $h$  for this portion of the mesh exceeding the plane is taken to be the  
336 mean area-weighted height of all triangles above this plane,  $s$  is the summed frontal area of all mesh triangles above  
337  $z_d$  that face into the chosen wind direction and  $S$  is the total horizontal area of the surface components above  $z_d$ .

338 Munro (1989, 1990) modified the formula of Lettau (1969) to be applied to a single irregular surface cross-section  
339 of length  $X$ , sampled perpendicular to the wind direction. This modified formulation is easier to work with on a  
340 glacier where the roughness elements are irregular, closely spaced, and generally poor approximations of objects  
341 distributed over a plane. Instead of having to define an obstacle height above the plane,  $h$  is replaced with an  
342 effective height  $h^*$  expressed as twice the standard deviation from the standardized mean profile height;  $s$  is replaced  
343 with  $h^*X/2f$ , in which  $f$  is the number of profile sections that are above the mean elevation; and  $S$  is replaced with  
344  $(X/f)^2$ . This approach approximates the surface elevation profile as rectangular elements of equal size, and has been  
345 shown to give results within 12% of the silhouette area determined by integrating between true topographic minima  
346 (Munro, 1989). Importantly, roughness values derived this way over snow, slush and ice surfaces show reasonable  
347 agreement with roughness values derived from wind profiles (Brock et al., 2006). To investigate the nature of the  
348 roughness computed this way for north-south and east-west impinging wind directions, cross profiles longer than  
349 1.5 m at 0.4m intervals orientated E-W and N-S were extracted from each scanned surface. Cross-sections were  
350 detrended to remove the influence of any general surface slope at the site, and roughness was computed on each of  
351 these cross-sectional profiles following the modifications of Munro ~~for each detrended surface profile~~. Mean profile  
352 roughness for these two wind directions are presented for each sampled surface.

## 353 **2.7 Manual measurements of surface change**

354 ~~Traditional stake measurements of glacier surface lowering made at a single point are unreliable within the~~  
355 ~~inhomogeneous surface of a penitente field, as multiple measurements are required to characterize the complex~~  
356 ~~surface. One alternative is to measure surface lowering at intervals along a profile perpendicular to the main axis of~~  
357 ~~alignment of the penitentes. Such a reference was installed along the 5 m long eastern margin of site A, between two~~  
358 ~~longer corner stakes drilled 3 m into the ice using a Kovaes hand drill. The distance between a levelled string and~~  
359 ~~the glacier surface was measured using a standard tape measure at 0.2 m intervals on 23 November. Subsequent~~  
360 ~~measurements, on the 12 and 21 December and on 4 January, were made at 0.1 m intervals. All measurements were~~  
361 ~~recorded to the nearest centimetre, and the error on each measurement is conservatively estimated to be 2.0 cm,~~  
362 ~~which is assumed to capture the error associated with the horizontal position of the measurements along the~~  
363 ~~reference frame and the vertical measurements of the distance to the surface beneath.~~

## 364 **3. Results**

### 365 **3.1 Evaluation of the quality and suitability of penitente scans by TLS and Kinect**

366 ~~At the~~The test site, ~~the~~ was well-developed snow penitentes ~~were well-developed and between 0.5 and~~ 1.0 m in  
367 height in a channel (Figure 1b). TLS scans ~~were made~~ of these penitentes ~~to illustrate the capabilities of this more~~  
368 ~~conventional scanning system in capturing the penitente surfaces. TLS scans~~ were taken from five different vantage  
369 points ~~positioned~~ above the penitentes. The penitente surface produced by the TLS had surface slope ranging  
370 between -30 and 90 degrees, indicating that overhanging surfaces within the penitente field are can be captured,  
371 ~~however. However the limitations of this conventional fixed-point scanning system in capturing the penitente~~  
372 ~~surfaces is illustrated by the fact that~~ only 58% of the total surveyed horizontal area could be scanned, as the deepest  
373 parts of the troughs were obscured from the view ~~of TLS~~ by the surrounding penitentes (Figure 2a). By comparison,  
374 the hand-held, mobile nature of the Kinect means that ~~100% of the~~ whole surface of the penitente field can be  
375 captured as the field of view can be adjusted into almost limitless close-range positions. ~~The long range of the TLS~~  
376 ~~makes it easier to cover large areas in comparison to, although~~ the close range Kinect sensor, ~~but as only penitente~~  
377 ~~tips are scanned the utility of this larger areal coverage is limited~~ impractical to apply over large areas.

378 ~~The Kinect scan~~For the direct comparison of the two methods on a reference boulder, the Kinect-derived surface,  
379 produced from three mosaicked meshes was aligned to ~~that~~ the surface produced from the TLS point clouds. The  
380 TLS scan was incomplete, with parts of the top and overhanging surfaces of the boulder missing due to being  
381 obscured from the TLS survey positions, while the Kinect scan achieved complete coverage of the boulder. The  
382 difference between the two aligned meshes where overlapping data existed was always < 2 cm (Figure 2b), which is  
383 well within the error of the georeferenced TLS surface model. Larger differences in Figure 2b, up to 5 cm, occur  
384 only where there are holes in ~~one of~~ the surfaces being compared.

385 It is difficult to formally assess the total error of the surfaces produced by the Kinect scans because the ~~proprietary~~  
386 ~~software, ReconstructMe™ and Poisson surface reconstruction in Meshlab, are all~~ workflow involves several black  
387 box processing steps in the workflow. The mean alignment errors of the mesh mosaicking step in Meshlab is < 0.4  
388 cm and quantifiable errors associated with the GPS positions, subsequent measurement of the stake bottom positions  
389 relative to the GPS positions are all < 2.0 cm. However, ~~in this study~~ the three-dimensional georeferencing error in  
390 this study is large (Table 1) compared to the other sources and ~~can be~~ is therefore taken as a reasonable value for the  
391 error of the total process chain. Errors given on the seasonal mass, volume and surface changes are based on  
392 summing the squares of the mean elevation difference between the marker stakes and ground control points (GPCs)  
393 at each site on the first and last survey dates.

### 394 3.2 Meteorological conditions

395 During the study period one significant snowfall event occurred on the 8<sup>th</sup> December 2013, when the sonic ranger  
396 recorded ~~an increase of a~~ surface height increase of 0.09 m over the course of the day, ~~and temperature and~~  
397 ~~incoming longwave radiation increase progressively~~ (Table 2). ~~The surface conditions of~~Surface albedo and ~~surface~~  
398 temperature are derived from radiation measurements that ~~integrate the signal from a sample~~ an area beneath the  
399 instrument. Surface temperature was calculated from measured surface longwave emissions, assuming ~~a surface~~  
400 ~~longwave~~ emissivity of 1. Over the study period, ~~air temperature and atmospheric longwave receipts increase, while~~  
401 albedo decreases and derived surface temperature increases (Table 2). Thus, over the course of the study, ~~the~~  
402 atmospheric energy supply increases and ~~the~~ surface properties become gradually more conducive to melting. ~~In the~~  
403 ~~three measurement periods 22, 38 and 43% of hourly values of surface temperature exceed the melting point and~~  
404 ~~the~~The warming atmosphere is clearly expressed in the positive degree days of the three periods which are 3.7, 2.2  
405 and 31.5 over the 16, 9 and 14 day-long periods respectively. ~~The height change difference~~Hourly surface  
406 ~~temperatures exceed the melting point in 22, 38 and 43% of cases in each period respectively. Daily surface~~  
407 ~~lowering rates calculated~~ between ~~the~~ hourly mean sensor ~~to~~ surface distance recorded by the AWS sonic ranger at  
408 midnight at the end of the survey days indicates lowering rates of 17, 37 and 56 mm day<sup>-1</sup> over the ~~same~~three  
409 measurement intervals, ~~indicating~~confirming that the increasing energy receipts translate into increasing rates of  
410 surface lowering at the AWS.

### 411 3.3 Areal scans of penitente surfaces

412 Surface lowering rates derived from the ~~computed~~calculated volume changes per unit area are 21, 41 and 70 mm  
413 day<sup>-1</sup> over each interval at site A, and 57 and 61 mm day<sup>-1</sup> over the last two intervals at site B. Surface lowering  
414 calculated as the difference between successive hypsometric mean mesh elevation for each site were within a few  
415 millimetres of the volume computations: 22, 38 and 69 mm day<sup>-1</sup> for the three measured intervals at site A, and 54  
416 and 60 mm day<sup>-1</sup> for the last two intervals at site B. The total surface lowering over the whole available period  
417 computed by volume change (hypsometric mean height change) was 1.68 (1.77) ± 0.11 m at site A and 1.37 (1.32) ±  
418 0.38 m at site B. Surface height changes recorded at site A over the same period as at site B were 1.35 (1.31) ±  
419 0.21 m, indicating that the values were repeatable ~~aeross~~at both sites. The volume loss was converted to mass loss  
420 ~~on the basis of~~using the mean snow density of 426 kg m<sup>-3</sup> (with an assumed error of ± 5%) measured in a 1.10 m  
421 snow pit excavated on 22 November 2013 beside the ~~weather station~~AWS. Mass loss at site A computed from mesh  
422 volume ~~changes~~change (hypsometric height ~~changes~~change) between 25 November and 3 January was 716 ± 58  
423 (754 ± 59) kg m<sup>-2</sup>, ~~indicating an underestimation of mass loss but that the two computation methods are within error~~  
424 ~~of each other~~. Mass loss at site B from mesh volume changes (hypsometric height changes) between 11 December  
425 and 3 January was 582 (562) ± 166 kg m<sup>-2</sup>. Measurements at site A over the same period give mass loss of 573 (558)  
426 ± 95 kg m<sup>-2</sup>, so again, measurements at both sites are within error of each other.

427 The morphometry of the sampled penitentes changed visibly over the measured intervals (Figures 3 and 4). The  
428 strong east-west ~~preferential orientation~~lineation and preferred north and south surface aspect predicted from theory  
429 developed early and was maintained throughout study period. ~~The expression of this alignment is more convoluted~~  
430 ~~in the stages of development studied here than the parallel rows of penitentes used in model representations~~  
431 ~~(Corripio and Purves, 2005; Lhermitte et al., 2014)~~. Over time ~~the~~ penitente troughs became fewer in number, but  
432 wider and deeper ~~in keeping with the increasing surface relief evident in the manual measurements~~. This is reflected  
433 ~~by increasing~~causes total surface area, ~~with the penitente surfaces to increase~~; at site A ~~providing the true surface is~~  
434 between 1.7 and 4.0 times the ~~surface area of the~~horizontal equivalent area, ~~and at site B providing~~ between 2.1 and  
435 3.7 times the horizontal surface area equivalent ~~and at site B~~ (Figure 4 a & b). Snowfall during the first measurement  
436 interval decreases the surface area ~~at site A~~ over that interval. ~~The surface~~Surface relief, expressed by the vertical  
437 range of the mesh, also increases through time, except when snowfall partially filled the developing penitentes,  
438 ~~reducing and reduces~~ both the range of the surface and the general slope angle. ~~Nevertheless, the morphometric~~

439 ~~properties of the meshes broadly meet the properties of simplified surfaces.~~ The largest part of the surface is facing  
440 southwards, and the predominant angle generally steepens over time, though again this trend is reversed by snowfall  
441 (Figure 4 c & d). From the onset of measurements the surface aspect distribution is strongly dominated by north and  
442 south facing components and this becomes more pronounced in the latter measurements and the preferred  
443 orientation rotates slightly over the course of the season (Figure 4 e & f).

#### 444 **3.4.3.4 Manual measurements of reference cross-profile**

445 The surface properties from manual measurements were computed on data sampled at 0.2 m over 5.0 m. Maximum  
446 relief of the sampled penitente profile, defined as the range of the distance from the horizontal reference to the  
447 surface, increased over time from 0.76, through 0.83 and 1.00 to 1.38 m on each measurement date. The standard  
448 deviation of the surface remained relatively unchanged with values of 0.24, 0.26, 0.28 and 0.32 m at each  
449 measurement date. Surface lowering rate calculated by differencing the mean surface height along the profile on  
450 each measurement data was 13, 57 and 61 mm d<sup>-1</sup> over the three sampled intervals, giving a total mean surface  
451 lowering of 1.61 ± 0.14 m between 23 of November and 4 January. These manual measurements along the cross-  
452 profile compare well to the aeriially-averaged lowering rates from the scanned surfaces, despite the fact that the  
453 manual measurements are made in only 2 dimensions, do not visually represent the complexity of the penitente  
454 surfaces, and individual points are sometimes out of the range of error of the Kinect (Figure 5). The computed mass  
455 loss over the same period is 688 ± 70 kg m<sup>-2</sup>, which underestimates, but is within error of, the value for site A  
456 derived from volume changes.

457 To investigate the impact of sampling resolution, maximum elevation range, mean surface height compared to the  
458 horizontal reference and mean surface lowering were calculated from manual measurements at 0.1 (n = 52), 0.2 (n =  
459 26), 0.4 (n = 14) and 1.0 m (n = 6) intervals on the last three measurement dates. The highest resolution sample was  
460 taken as a reference against which to evaluate coarser sampling. Surface relief differed from that measured at 0.1 m  
461 by maxima of 0.13, 0.29 and 0.41 m for 0.2, 0.4 and 1.0 m sampling intervals respectively. Mean measured surface  
462 height was within 0.03 m of the highest resolution measurements at 0.2 m and 0.4 m intervals, and within 0.12 m at  
463 1.0 m resolution. Mean lowering rates at 0.1, 0.2 and 0.4 m sampling intervals were all within 3 mm d<sup>-1</sup>. This  
464 increased to a maximum of 12 mm d<sup>-1</sup> when the sampling resolution was decreased to 1.0 m. Decreasing the length  
465 of the sampled profile down to 2 m alters the mean lowering rate by less than 5 mm day<sup>-1</sup> at sampling resolutions of  
466 0.1, 0.2 and 0.4 m.

467 Probing of the snow depth on 25 November indicated mean snow depth of 1.83 m (standard deviation 0.56 m). The  
468 underlying ice surface does not appear to be influencing the structure of the overlying snow penitentes (Figure 5).  
469 However, it is difficult to draw a firm conclusion based on these measurements, particularly as, while the surface of  
470 the penitentes was still snow on the 3 January, in several instances the surface had lowered below the level of the ice  
471 interface suggested by the initial probing.

#### 472 **3.5 Surface roughness assessments**

473 Given that aerodynamic measurements to determine the most suitable representative height and zero displacement  
474 level for penitentes are thus far unavailable, the approach taken here was to do an exploratory study and compute  
475 geometric surface roughness values using various ways of expressing  $h$  and  $z_d$ . As a consequence the results are  
476 purely illustrative and while patterns can be drawn from them that have meaning for understanding the nature of the  
477 computation, the applicability of these values in turbulent exchange calculations remains to be established. The  
478 representative height,  $h$ , used in the calculations increases over time in all cases, and is bounded by the maximum  
479 case, taking  $h$  to be the ~~as~~ range of the detrended surfaces (maximum), and the minimum case, taking  $h$  as twice the  
480 standard deviation of the detrended surface (Figure 56). For clarity, the other two ease ~~intermediate~~ values are not  
481 included in the plots shown here. ~~Figure 6.~~ Differences within a single in  $h$  computed by the same method between



482 ~~the two sites~~ can reach as much as 0.2 m between the two sites, although the pattern of change over time is  
483 consistent.

484 The application of ~~Lettau's~~ Lettau's (1969) formula is considered to be invalid if the ratio of the frontal area to the  
485 planar area of the obstacles exceeds 0.2 – 0.3, with 0.25 often being chosen as a single value. ~~In~~ This ratio is greater  
486 than 0.2 for all cases of the penitente surfaces ~~this ratio exceeds 0.2, and only 6% of cases computed at 10° intervals~~  
487 of bearing over all dates are below 0.3, and these are all early in the season, before after the 20<sup>th</sup> December is always  
488 greater than 0.3. Exceeding this threshold implies that the obstacles are so closely packed that ‘skimming’ airflow  
489 will occur. Ignoring this issue, calculated  $z_0$  values increase with time and show a strong dependence on the  
490 impinging wind direction, with values peaking for wind directions perpendicular to the alignment of the penitentes  
491 (Figure 67). Calculated  $z_0$  ranges from 0.01 – 0.90 m, depending on the way in which the representative height is  
492 expressed, the ~~time of year~~ date and the wind direction (Figure 78). However, given the close spacing of the  
493 penitentes it ~~seems appropriate~~ is likely more valid to ~~also~~ explore what the calculated  $z_0$  would be ~~like~~ when  
494 applying a zero displacement height offset, ~~although again is applied. Again,~~ in the absence of validation data ~~these~~  
495 numbers from independent measurements, calculated values can be only indicative of the pattern of roughness  
496 computed by these methods. Introducing the zero displacement height reduces the maximum calculated roughness  
497 by about half, and also reduces the variability between different representative heights (Figure 78), as a smaller  $h$   
498 value translates into a smaller  $z_d$  so that the calculation is performed on a larger portion of the mesh.

499 Surface roughness assessments on the basis of calculations following Munro's modification for single profile  
500 measurements were applied to cross profiles longer than 1.5 m yielding 20 (6) profiles orientated N-S and 33 (7) E-  
501 W at site A (B). Surface amplitude increases over time, and the amplitude of the N-S running cross profiles is  
502 generally larger than the E-W running cross profiles, as illustrated in the example of site B (Figure 8). ~~The~~ 9). Table  
503 3 shows the calculated roughness values at each survey date, revealing that while profile-computed roughness  
504 length increases monotonically over time at site B, ~~but shows a reduction~~ it reduces over the first period at site A,  
505 associated with snowfall during this period. Both the range and relative increase in roughness over time is larger for  
506 the N-S running profiles. The computed roughness at both sites is 4.3 to 6.8 times larger for airflow impinging on  
507 the penitente field in an E-W direction than for airflow in the N-S direction. This is contrary to the results computed  
508 on the full 3D mesh surface, but is understandable because this formulation relies on the amplitude of the surface,  
509 which is generally larger in the N-S orientated cross profiles than the E-W running cross profiles.

## 510 4. Discussion

### 511 4.1 Penitente morphology

512 Although the natural penitentes sampled here are more convoluted than the parallel rows of penitentes used in model  
513 representations (Corripio and Purves, 2005; Lhermitte et al., 2014), the morphometric properties of the meshes  
514 broadly meet the properties of simplified surfaces. The penitente surface represents a much larger total surface area  
515 than the equivalent non-penitente surface and the control of solar radiation on penitente morphology means that the  
516 vast majority of the surface consistently dips steeply to the north and south at all stages of development. This means  
517 that the angle of incidence of direct solar radiation is reduced, decreasing both the intensity of the solar beam and the  
518 proportion of it that is absorbed. Although these effects are counteracted by multiple reflections of solar radiation  
519 within the penitente (Corripio and Purves, 2005; Lhermitte et al., 2014; Claudin et al., 2015) modeled mean net  
520 shortwave at sampled points in an example penitente field at the summer solstice at 33°S is about half of that of a  
521 level surface (Corripio and Purves, 2005). However, given the larger surface area of the penitente field compared to  
522 a flat surface, the total absorbed shortwave is a third higher in the modeled penitentes, broadly in line with the  
523 observed effect of penitentes on spatially-averaged albedo (Warren et al., 1998; Corripio and Purves, 2005;  
524 MacDonell et al., 2013; Cathles et al., 2014; Lhermitte et al., 2014). For idealized penitentes at 33°S during summer  
525 solstice, modeled increase in net shortwave radiation over penitentes is not compensated by modelled changes in net

526 longwave radiation, meaning that the excess energy receipts must be compensated by either turbulent energy fluxes  
527 or consumption of energy by melting (Corripio and Purves, 2005).

528 Unless a snowfall event occurs to partially fill the troughs, surface relief, slope angle, penitente spacing and total  
529 surface area all increase over time as the penitentes develop and deepen. Thus the impact of penitentes on surface  
530 properties will also change along with the morphological changes. At Tapado Glacier, penitentes are initially  
531 overhanging to the north, and the southfacing sides are convex compared to the northfacing overhanging faces. Over  
532 the season the penitentes become more upright as the noon solar angle gets higher. Idealized modelling based on  
533 measurements at Tapado Glacier, shows that concave and convex slopes, as well as penitente size have been shown  
534 to impact the apparent albedo as measured by ground and satellite sensors (Lhermitte, et al., 2014), and there may be  
535 some value in assessing the impact of these morphometry changes on albedo over time. In the context of the  
536 numerical theory of Claudin and others (2015), penitente spacing controls the atmospheric level at which water  
537 vapor content is representative of the bulk surface properties. Simultaneous field or laboratory measurements of  
538 penitente spacing evolution and vapor fluxes above the surface would be required to solidly confirm this, but the  
539 spacing from the field measurements provided here can be used as an indication of the level at which measurements  
540 would need to be made in order to capture the bulk surface fluxes rather than fluctuations governed by the small-  
541 scale surface terrain.

542 ~~4.2 Prevailing wind direction differs only slightly in each period with an increasing northwesterly component in the~~  
543 ~~second two periods compared to the first. This may be related to the occurrence of snow during the first period,~~  
544 ~~which can be expected to alter the thermally driven valley wind systems. Over the whole study period wind direction~~  
545 ~~is predominantly from the south westerly sector, but swings through southerly to easterly thereby encompassing~~  
546 ~~both extreme wind angles used in the roughness calculations here (Figure 9). This indicates that the effective~~  
547 ~~roughness can be expected to differ significantly depending on the wind direction.~~

### 548 **3.5 Manual measurements of reference cross-profile**

549 Using data sampled at 0.2 m over 5.0 m, the maximum relief of the sampled penitente profile, defined as the range  
550 of the maximum and minimum distance from the horizontal reference to the surface, increased through time, from  
551 0.76, 0.83, 1.00 to 1.38 m on each measurement date. The standard deviation of the surface remained relatively  
552 unchanged over time with values of 0.24, 0.26, 0.28 and 0.32 m at each measurement date. The difference in the  
553 mean surface height measured at the ablation frame profile at site A indicates mean lowering rates of 13, 57 and 61  
554 mm day<sup>-1</sup> over the three sampled intervals resulting in a total mean surface lowering of  $1.61 \pm 0.14$  m between 23 of  
555 November and 4 January. The manual measurements at the cross profile compare well to the aeri ally averaged  
556 lowering rates from the scanned surfaces, despite the fact that the manual measurements are only made in 2  
557 dimensions, do not visually represent the complexity of the penitente surfaces, and individual points are sometimes  
558 out of the range of error of the Kinect (Figure 10). The computed mass loss over the same period is  $688 \pm 70$  kg m<sup>-2</sup>,  
559 which underestimates the value for site A derived from volume changes but is within error, even accounting for the  
560 two extra days measurement interval.

561 Values of maximum elevation range and standard deviation along the profile, mean surface height compared to the  
562 horizontal reference and mean lowering were computed from the manual measurements for available data at 0.1 (n =  
563 52), 0.2 (n = 26), 0.4 (n = 14) and 1.0 m (n = 6) intervals to investigate the impact of sampling resolution. The  
564 highest resolution sample was taken as a reference against which to evaluate the values from coarser resolution  
565 sampling. Calculated surface relief differed from that measured at the highest resolution by maxima of 0.13, 0.29  
566 and 0.41 m for 0.2, 0.4 and 1.0 m sampling intervals respectively. Mean measured surface height was within 0.03 m  
567 of the highest resolution measurements at 0.2 m and 0.4 m intervals, and within 0.12 m at 1.0 m resolution. Mean  
568 lowering rates at 0.1, 0.2 and 0.4 m sampling intervals were all within 3 mm day<sup>-1</sup> with the difference increasing to a  
569 maximum of 12 mm day<sup>-1</sup> when the sampling resolution was decreased to 1.0 m. Decreasing the length of the

570 ~~sampled profile down to 2 m alters the mean lowering rate by less than 5 mm day<sup>-1</sup> at sampling resolutions of 0.1,~~  
571 ~~0.2 and 0.4 m.~~

572 ~~Probing of the snowdepth on 25 November indicated a mean snow depth of 1.83 m (standard deviation 0.56 m).~~  
573 ~~The underlying ice surface identified by the snow probing, does not appear to be influencing the structure of the~~  
574 ~~snow penitentes developing in the current season. However, it is difficult to draw a firm conclusion based on~~  
575 ~~measurements at only 0.2 m spacing, particularly as, while the surface of the penitentes was still snow on the 3~~  
576 ~~January, in several instances the surface had lowered below the level of the ice interface indicated by the initial~~  
577 ~~probing.~~

## 578 ~~4. Discussion~~

### 579 ~~4.1 Methods of measuring change of rough glacier surface elements~~

580 The test site for scanning penitentes with a TLS was chosen as ~~it provided the most optimal viewing angles possible~~  
581 ~~from scanning positions, as the penitentes lay in a river bed and scanning positions could be established on the~~  
582 ~~surrounding river banks to look down into higher ground overlooking the penitente field, thereby offering the best~~  
583 ~~viewing angles possible.~~ Nevertheless, the terrestrial laser scanning could only capture the ~~tips rather than the whole~~  
584 ~~surface upper portions~~ of the penitentes ~~and, as~~. As ablation is at its maximum in the troughs, TLS data is therefore  
585 not able to determine the true volume change ~~ongoing in of~~ penitentes. The coverage would be increased if a higher  
586 viewing angle could be achieved, but the steep, dense nature of penitente fields makes it difficult to imagine where  
587 sufficient suitable locations can be found surrounding glaciers or snowfields with penitentes. In contrast, the mobile  
588 Kinect sensor can be moved across the complex relief of the penitente field to make a complete surface model.  
589 Although it is in principle possible to capture a large area with the ReconstructMe software used here, and it offers  
590 the advantage of providing real time feedback on the mesh coverage, it proved difficult to capture the study sites in a  
591 single scan given (i) the reduced signal range of the sensor over snow and ice (Mankoff ~~et al., and Russo,~~ 2013), and  
592 (ii) the difficulty of moving around the penitente field. As a result, partial scans were obtained, with the  
593 disadvantage that subsequently combining these introduces a substantial degree of additional error associated with  
594 alignment if the component scans were not of high quality at the margins, or did not overlap adjacent scan areas  
595 sufficiently. A combination of these two techniques might allow the extrapolation of small-scale geometry changes  
596 and volume loss determined from a Kinect surface scan to be extrapolated usefully to the glacier or snowfield scale  
597 ~~using measurements made with a TLS.~~

598 Despite not visually capturing the complex ~~surface properties morphology~~ of the penitentes, manual measurements  
599 of surface height change in a penitente field along a profile cross-cutting the penitentes are robust for determining  
600 mean surface lowering rates, and show good agreement to the volume changes computed from differencing the  
601 digital surface models scanned in detail using a Kinect. Thus, the detailed surface geometry need not be known in  
602 order to reasonably calculate the total volume loss over time within penitente fields. Comparison of the manual  
603 sampling at different intervals ~~suggests suggests~~ that five samples per meter is adequate to characterize ~~surface change~~  
604 ~~of penitentes, but that data will be unreliable is the cross-profile is too short.~~ Over the 39 days of the study, ~~the~~ mass  
605 loss calculated from 26 points spaced at 0.2 m intervals along a 5 m profile crosscutting the penitentes differed from  
606 that calculated from volume change computed on surface meshes consisting of over 1.3 million points and covering  
607 an area of 7 m<sup>2</sup> by only 28 kg m<sup>-2</sup>. Although this difference was within the error of the two measurement types, the  
608 seasonal difference, assuming that this difference applies to a whole ablation season of 120 days would be 86 kg m<sup>-2</sup>,  
609 and applied to the whole glacier (3.6 km<sup>2</sup>) would amount to an underestimate of mass loss over an ablation season of  
610 0.3 gigatonnes. As a side note, the probing of snowdepth carried out as part of this study highlights the difficulty in  
611 identifying the underlying ice surface, or summer ablation surface, ~~in this way~~ within a penitente field, suggesting  
612 that a single location must be sampled very densely to obtain a characteristic snowdepth ~~in by this way method.~~

### 4.3 Surface roughness

#### 4.2 Penitente morphometry and change in time

The manual measurements at 0.2 m intervals are adequate to determine the mean surface lowering within a penitente field, giving confidence to this type of simplified measurement on seasonal timescales. However, the interval measurements cannot capture the surface morphometry, or how it changes in time.

At all times the penitente surface represents a much larger total surface area than the equivalent non penitente surface. Over time the surface relief, and slope angle, increases as the penitentes deepen, unless a snowfall event occurs to partially fill the troughs, which also reduced the mean surface slope. The control of solar radiation on penitente morphology means that the vast majority of the surface consistently dips steeply to the north and south at all stages of development. This means that the angle of incidence of direct solar radiation is reduced, decreasing both the intensity of the solar beam and the proportion of it that is absorbed. Although these effects are counteracted by multiple reflections of solar radiation within the penitente (Corripio and Purves, 2005; Lhermitte et al., 2014; Claudin et al., 2015) modeled mean net shortwave in an example penitente field at the summer solstice at 33°S is about half of that of a level surface (Corripio and Purves, 2005). However, given the larger surface area of the penitente field compared to a flat surface, the total absorbed shortwave is a third higher in the modeled penitentes. At Tapado Glacier, penitentes are initially overhanging to the north, and the southfacing sides are convex compared to the northfacing overhanging faces. Over the season the penitentes become more upright as the noon solar angle gets higher. Idealized modelling based on measurements at Tapado Glacier, shows that concave and convex slopes, as well as penitente size have been shown to impact the apparent albedo as measured by ground and satellite sensors (Lhermitte, et al., 2014), and there may be some value in assessing the impact of these morphometry changes on albedo over time. For the idealized penitente surface at 33°S during summer solstice case, modeled increase in net shortwave radiation over penitentes is not compensated by modelled changes in net longwave radiation, meaning that the excess energy receipts must be compensated by either turbulent energy fluxes or consumption of energy by melting (Corripio and Purves, 2005).

In the context of the numerical theory of Claudin and others (2015), progressive widening of the penitente spacing, as observed at both site A and B, is indicative of changes in the atmospheric level at which water vapor content is unaffected by the vapor flux from the penitente surface. Simultaneous field or laboratory measurements of penitente spacing evolution and vapor fluxes above the surface would be required to solidly confirm this, but the field measurements provided here can be used as an indication of the level to which vapor flux from the surface is influencing the boundary layer vapor content.

alters the geometrical surface roughness as they develop over the ablation season. Values calculated using 4.3 Surface roughness

In this work a single, simple, geometric relationship (Lettau 1969) ~~was~~ were investigated because a profile-based version of this formulation has previously been tested against aerodynamic measurements over glacier surfaces (Munro, 1989, 1990; Brock et al., 2006). Certainly other relationships could be explored in the context of linearized glacier features, but given the wide spread of values produced in previous comparisons such an analysis might be of limited value in the absence of simultaneous aerodynamical investigations (Grimmond and Oke, 1999). Furthermore, the results of Grimmond and Oke (1999) indicate that for the cities sampled, the Lettau method gives  $z_0$  values that are in the middle of the range of all the methods. The analysis of geometric computations of roughness properties in Grimmond and Oke (1999) highlight the importance of correctly determining  $z_d$ , and limited sensitivity analyses show the computed  $z_d$  and  $z_0$  to be strongly dependent on the dimensions of the obstacles. Lettau's (1969) formula, which does not account for  $z_d$ , overestimates roughness for densely packed obstacles, but this overestimation does not compensate sufficiently to reproduce values of  $z_d + z_0$  produced for densely packed obstacles from formulations that include  $z_d$  in the computation of  $z_0$ . ~~This means that~~ Thus, Lettau's formula is

657 expected to estimate the zero velocity point of a logarithmic wind profile to be lower than formulations that include  
658  $z_d$  in their computation of  $z_0$ . In this work however we computed  $z_d$  in a separate preceding step to explore the impact  
659 of  $z_d$  on the computed the computation of  $z_0$ .

660 ~~As penitentes fields present very densely packed roughness elements, the frontal area of the surface tends to be large~~  
661 ~~compared to the ground area, and the limits of the~~ The ratio of frontal to planar area ~~found in this study of the~~  
662 ~~penitentes~~ implies that skimming flow ~~is almost always occurring over penitente fields~~ prevails, such that turbulent  
663 airflow in the overlying atmosphere does not penetrate ~~to the full depth of the penitente fields~~ troughs. This is in  
664 agreement with the theory of formation and growth of penitentes, in which the development and preservation of a  
665 humid microclimate within the penitente hollows troughs is required to facilitate differential ablation between the  
666 trough and tip of the penitente. ~~As~~ Although the ~~spacing between the data here shows that~~ penitentes ~~also increases~~  
667 ~~over the ablation season the features~~ become less densely packed over time, ~~although the skimming flow regime~~  
668 ~~persists over the study period, and~~ available data ~~are~~ is insufficient to determine if ~~the spacing increases sufficiently~~  
669 ~~by the this holds true to the~~ end of the ~~season to comply with the applicable limits of the roughness calculation used~~  
670 ~~here~~ ablation season.

671 Application of geometrical roughness equations is made more problematic in penitente fields as it is not clear how  
672 an appropriate representative obstacle height should be expressed, nor how to define the zero displacement level  
673 during ~~presumed~~ skimming flow. Roughness calculated using a range of possible representations of these properties  
674 point towards roughness values in the order of 0.01-0.10 m during the early part of the ablation season and 0.10-  
675 0.50 m after the end of December. These values are in line with the roughest values previously published for glacier  
676 ice (Smeets et al., 1999; Obleitner, 2000). The topographic analysis clearly shows that in the absence of intervening  
677 snowfall events, this roughness increase is related to the deepening of the penitentes over time and an increase of the  
678 surface amplitude. The ~~patterns~~ pattern of the computed roughness properties is consistent between the two  
679 neighbouring sites, but individual values can differ, suggesting that ~~local~~ relief varies substantially over short  
680 distances and sampling a ~~larger~~ large area ~~would be beneficial in order~~ is necessary to capture mean properties.

681 The strong alignment of penitentes means that ~~roughness~~ calculated roughness is strongly dependent on ~~the~~ wind  
682 direction. Roughness calculated from 3D surface meshes ~~is~~ are higher for wind impinging in a north-south direction,  
683 as the large faces of the penitentes form the frontal area in this case. In contrast, ~~if~~ roughness ~~is computed~~ calculated  
684 for individual profiles extracted from the mesh to mimic manual transect measurements in the field, ~~roughness~~ is  
685 between 3 and 6 times larger for air flow along the penitente lineation (E-W) than it is across the lineation (N-S).  
686 ~~While clearly highlighting that the surface roughness of the strongly aligned penitente fields is dependent on~~  
687 ~~wind impinging in an east-west~~ direction, ~~this contradiction poses~~ than in a ~~conundrum as neither~~ north-south  
688 direction. ~~Neither~~ approach has been ~~specifically~~ evaluated against independent surface roughness derived from  
689 atmospheric profile measurements over penitentes. Consequently, although surface roughness calculations on the  
690 basis of profile geometry have been evaluated against aerodynamic roughness over rough ice surfaces, the available  
691 data is insufficient to distinguish if maximum aerodynamic roughness is associated with wind flowing across or  
692 along the penitente lineation. Thus it is not clear which ~~pattern is more~~ method captures the appropriate relationship  
693 between wind direction and surface roughness for calculating turbulent fluxes over penitentes. In principle it sounds  
694 reasonable to expect airflow across the penitente lineation to maximize turbulence as the penitentes present a large  
695 surface area to the wind, yet, if skimming flow is established, with the result that only the tips of the penitentes are  
696 determining the structure of the turbulence then roughness in this direction would be strongly reduced, and perhaps  
697 even be less than for air flow along the penitente lineation, for which the smaller frontal area reduces the likelihood  
698 of skimming flow. Further investigation of this in order to quantify the impact of penitentes on turbulent fluxes for  
699 various airflow patterns requires measurement of turbulent fluxes using eddy covariance or atmospheric profile  
700 methods, which would demonstrate the nature of the directional roughness and establish the impact of penitentes on  
701 turbulent energy fluxes for different wind directions. Such measurements would be best implemented in a manner  
702 which can sample all wind directions equally, and eddy covariance systems for which analysis is limited to a sector



703 of airflow centred around the prevailing airflow source, might not be able to capture the nature of the directional  
704 dependence correctly.

705 Prevailing wind direction differs only slightly in each period with an increasing northwesterly component in the  
706 second two periods compared to the first. This may be related to the occurrence of snow during the first period,  
707 which is expected to alter thermally-driven valley wind systems. Over the whole study period wind direction is  
708 predominantly from the south-easterly and north-westerly sectors, and swings through both extreme wind angles  
709 used in the roughness calculations here (Figure 10). This indicates that the effective roughness at this site can be  
710 expected to differ significantly over time depending on the wind direction.

711 In this study we did not explicitly compute the blending height as available formulae are dependent upon  $z_0$  and  $z_d$ .  
712 Estimates of the blending height independently from  $z_0$  and  $z_d$  have been suggested to be 2.5 - 4.5 times  $h$ , as twice  
713 the mean element spacing, or as combination of the height and spacing (see examples within Grimmond and Oke,  
714 1999). Given that only atmospheric measurements above the blending height give representations of integrated  
715 surface fluxes and conditions, the first approach would imply that aerodynamical or flux measurements over  
716 penitentes would have to be carried out at ~~some~~considerable height above the surface to capture mean surface  
717 properties rather than the effects of individual roughness elements. The mathematical model of Claudin and others  
718 (2015) ~~indicates that the~~gives a characteristic length scale for the level at which the vapour flux ~~does not~~ is constant  
719 in horizontal space, ~~and therefore is the product of mean surface properties,~~ that is related to the spacing of the  
720 penitentes. ~~Taking~~Interpreting this ~~to be representative of level as~~ the blending height ~~would imply~~implies that a  
721 ~~formulation for~~ the blending height might be ~~possible~~determined on the basis of spacing of penitentes alone, and that  
722 this in turn might contain useful data for understanding the structure and efficiency of turbulence above penitentes.  
723 ~~However, exploring~~Exploring these ideas requires information from detailed meteorological measurements as well  
724 as the geometrical information offered in this paper.

## 725 5. Conclusion

726 Surface scanning technology and software is an area of rapid development, and a number of potentially superior  
727 alternative set-ups and data capture sensors and software is now available. This study demonstrates that the  
728 Microsoft Kinect sensor can work successfully at close range over rough snow and ice surfaces under low light  
729 conditions, and generate useful data for assessing the geometry of complex terrain and surface roughness properties.

730 The data collected offers the first detailed study of how the geometry of penitentes ~~evolve~~evolve through time,  
731 highlighting the rate of change of surface properties over an ablation season that can serve as a guideline for  
732 parameterizing surface properties required for energy and mass balance modelling of penitente surfaces.

733 The ~~measurements~~results confirm that even relatively crude manual measurements of penitente surface lowering are  
734 adequate for quantifying the seasonal mass loss, which is good news for the validity of measurements of surface  
735 change on glaciers with penitentes. However, further measurements and/or modelling studies are required to  
736 determine if the mass loss from the expanded and convoluted surface of penitentes is enhanced or inhibited  
737 compared to mass loss in the absence of penitentes.

738 Aerodynamical roughness properties and related metrics over very rough surfaces remain poorly quantified and both  
739 geometric and meteorological determinations of these values show a wide spread; consequently it remains unclear  
740 what the best methods to use are or what values modellers would be best to use (Grimmond and Oke, 1999). In this  
741 context ~~penitentes and~~ further study of ~~them~~penitentes offers a useful opportunity as (a) their morphometric  
742 evolution over time allows various geometries to be evaluated by ~~instrumenting and scanning~~monitoring a single  
743 site, and (b) they offer a bridge between wind tunnel and urban field experimentation of turbulence and roughness  
744 over extreme terrain. Although validity of surface roughness calculations based on surface geometry remains to be

745 established for penitentes, this study highlights that (i) skimming flow is expected to persist over penitentes field,  
746 but is more likely under wind directions perpendicular to the penitente alignment; (ii)  $z_d$  is certainly greater than  
747 zero, and while the depth of penetration of surface layer turbulence into a penitente field is not clearly established it  
748 is likely to evolve with the developing penitentes, and values of  $z_d \sim 2/3h$  give results that are theoretically reasonable  
749 in the framework outlined by Grimmond and Oke (1999); (iii) the two methods of geometric computation of surface  
750 roughness applied here give conflicting results as to whether the effective surface roughness of penitentes is greater  
751 for airflow along or across the penitente lineation and (iv) more complete understanding of the impact of penitentes  
752 on the turbulent structure, its evolution in time, and its directional dependency, would require atmospheric  
753 measurements with no directional bias concurrent with measurements of penitentes morphology.

754 Potential future applications and analyses of the surfaces generated in this study include (i) using surface properties  
755 and roughness values as a guide for input into surface energy balance models; (ii) assessing the performance of  
756 models against the measured volume loss over time and (iii) evaluating how well simplified representations of  
757 penitente surfaces used in small scale radiation models and turbulence models capture the real-world complexity.  
758 Such studies would help establish the nature of the likely micro-climatic distribution of the surface energy balance  
759 within a real penitente field, and as a result the impact of penitentes on runoff and exchange of water vapour with  
760 the atmosphere.

761 **Author contributions.** L.N. designed the study. Fieldwork was carried out by L.N. and B.P. with M.P. providing  
762 the TLS. TLS and AWS equipment was provided by S.M. through collaboration with CEAZA. The data was  
763 analysed by L.N. and M.P. and L.N. prepared the preparation of the manuscript and figures.

764 **Acknowledgements.** Fieldwork for this study was funded by a National Geographic Waitt Grant. L.N. was  
765 supported by an Austrian Science Fund Elise Richter Grant (V309). M.-P. was supported within statutory activities  
766 No 3841/E-41/S/2015-2016 of the Ministry of Science and Higher Education of Poland. International cooperation  
767 was supported by the Centre for Polar Studies from the funds of the Polish Leading National Research Centre  
768 (KNOW) in Earth Sciences (2014–18). Thanks are also due to Mathias Rotach for reading the paper prior to  
769 submission.

770

## 771 **References**

772 Amstutz, G. C. (1958) On the formation of snow penitentes. *Journal of Glaciology*, 3 (24), 304-311.

773 Andreas, E. L. (2011). A relationship between the aerodynamic and physical roughness of winter sea ice. *Quarterly*  
774 *Journal of the Royal Meteorological Society*, 137(659), 1581–1588. doi:10.1002/qj.842

775 Bergeron, V., Berger, C., & Betterton, M. D. (2006). Controlled irradiative formation of penitentes. *Physical Review*  
776 *Letters*, 96(9), 098502, doi:10.1103/PhysRevLett.96.098502

777 Blumberg, D., & Greeley, R. (1993). Field studies of aerodynamic roughness length. *Journal of Arid Environments*.  
778 25(1), 39-48. doi:10.1006/jare.1993.1041

779 Brock, B. W., Willis, I. C., & Sharp, M. J. (2006). Measurement and parameterization of aerodynamic roughness  
780 length variations at Haut Glacier d’Arolla, Switzerland. *Journal of Glaciology*, 52(177), 281–297.  
781 doi:10.3189/172756506781828746

782 Brutsaert, W. (1975). A theory for local evaporation (or heat transfer) from rough and smooth surfaces at ground  
783 level. *Water Resources Research*, 11(4), 543–550.

- 784 Cathles, L. M., Abbot, D. S., & MacAyeal, D. R. (2014). Intra-surface radiative transfer limits the geographic extent  
785 of snow penitents on horizontal snowfields. *Journal of Glaciology*, 60(219), 147–154. doi:10.3189/2014JoG13J124
- 786 Claudin, P., Jarry, H., Vignoles, G., Plapp, M., & Andreotti, B. (2015). Physical processes causing the formation of  
787 penitentes. *Physical Review E*, 92(3), 033015. doi:10.1103/PhysRevE.92.033015
- 788 Corripio, J. G., & Purves, R. S. (2005). Surface energy balance of high altitude glaciers in the Central Andes: the  
789 effect of snow penitentes. In: De Jong C., Collins D.N. and Ranzi, R. (Eds) *Climate and Hydrology in Mountain*  
790 *Areas*. Wiley and Sons, Chichester, 15-27. Drewry, D. J. (1970). Snow penitents. *Weather*, 25(12), 556.
- 791 [Drewry, D. J. \(1970\). Snow penitents. \*Weather\*, 25\(12\), 556.](#)
- 792 Fassnacht, S. R., Oprea, I., Borlekse, G., & Kamin, D. (2014). Comparing Snowpack Surface Roughness Metrics  
793 with a Geometric-based Roughness Length. In *Proceedings of the AGU Hydrology Days 2014 Conference* (pp. 44–  
794 52).
- 795 Fassnacht, S. R., Stednick, J. D., Deems, J. S., & Corrao, M. V. (2009a). Metrics for assessing snow surface  
796 roughness from Digital imagery. *Water Resources Research*, 45, W00D31 doi:10.1029/2008WR006986
- 797 Fassnacht, S. R., Williams, M. W., & Corrao, M. V. (2009b). Changes in the surface roughness of snow from  
798 millimetre to metre scales. *Ecological Complexity*, 6(3), 221–229. doi:10.1016/j.ecocom.2009.05.003
- 799 Grimmond, C. S. B., & Oke, T. R. (1999). Aerodynamic Properties of Urban Areas Derived from Analysis of  
800 Surface Form. *Journal of Applied Meteorology*, 38(9), 1262–1292.
- 801 Hastenrath, S., & Koci, B. (1981). Micro-morphology of the snow surface at the Quelccaya ice cap, Peru. *Journal of*  
802 *Glaciology*, 27(97), 423–428.
- 803 Jackson, B. S., & Carroll, J. J. (1978). Aerodynamic roughness as a function of wind direction over asymmetric  
804 surface elements. *Boundary-Layer Meteorology*, 14(3), 323–330. doi:10.1007/BF00121042
- 805 Kaser, G., Großhauser, M., & Marzeion, B. (2010). Contribution potential of glaciers to water availability in  
806 different climate regimes. *Proceedings of the National Academy of Sciences*, 107(47), 20223–20227.  
807 doi:10.1073/pnas.1008162107
- 808 Kondo, J., & Yamazawa, H. (1986). Aerodynamic roughness over an inhomogeneous ground surface. *Boundary-*  
809 *Layer Meteorology*, 35(1983), 331–348.
- 810 Lettau, H. (1969). Note on Aerodynamic Roughness-Parameter Estimation on the Basis of Roughness-Element  
811 Description. *Journal of Applied Meteorology*, 8(5), 828-832.
- 812 Lhermitte, S., Abermann, J., & Kinnard, C. (2014). Albedo over rough snow and ice surfaces. *The Cryosphere*, 8(3),  
813 1069–1086. doi:10.5194/tc-8-1069-2014
- 814 Lliboutry, L. (1954). The origin of penitents. *Journal of Glaciology*, 2, 331–338.
- 815 Lliboutry, L. (1998). Glaciers of Chile and Argentina. In, R. S. Williams and J. G. Ferrigno (Ed). *Satellite image*  
816 *atlas of glaciers of the world: South America*. USGS Professional Paper 1386-I.
- 817 Macdonald, R. W., Griffiths, R. F. F., & Hall, D. J. J. (1998). An improved method for the estimation of surface  
818 roughness of obstacle arrays. *Atmospheric Environment*, 32(11), 1857–1864. doi:10.1016/S1352-2310(97)00403-2

- 819 MacDonell, S., Kinnard, C., Mölg, T., Nicholson, L. I., & Abermann, J. (2013). Meteorological drivers of ablation  
820 processes on a cold glacier in the semi-arid Andes of Chile. *The Cryosphere*, 7(5), 1513–1526. doi:10.5194/tc-7-  
821 1513-2013
- 822 Mankoff, K. D., & Russo, T. A. (2013). The Kinect: a low-cost, high-resolution, short-range 3D camera. *Earth*  
823 *Surface Processes and Landforms*, 38(9), 926–936. doi:10.1002/esp.3332
- 824 Manninen, T., Anttila, K., Karjalainen, T., & Lahtinen, P. (2012). Automatic snow surface roughness estimation  
825 using digital photos. *Journal of Glaciology*, 58(211), 993–1007. doi:10.3189/2012JoG11J144
- 826 Munro, D. S. (1989). Surface roughness and bulk heat transfer on a glacier: comparison to eddy correlation. *Journal*  
827 *of Glaciology*, 35(121), 343–348.
- 828 Munro, D. S. (1990). Comparison of Melt Energy Computations and Ablatometer Measurements on Melting Ice and  
829 Snow. *Arctic, Antarctic, and Alpine Research*, 22(2), 153–162. doi:10.2307/1551300
- 830 Naruse, R. and Leiva, J. C. (1997) Preliminary study on the shape of snow penitentes at Piloto Glacier, the central  
831 Andes. *Bulletin of Glacier Research*, 15, 99-104.
- 832 | Obleitner, F. (2000). The energy budget of snow and ice at ~~Breidamerhurjökull~~Breidamerkurjökull, Vatnajökull,  
833 Iceland. *Boundary-Layer Meteorology*, 97(3), 385–410.
- 834 Sinclair, K. & MacDonell, S. (2015) Seasonal evolution of penitente geochemistry at Tapado Glacier, northern  
835 Chile. *Hydrological Processes*, doi: 10.1002/hyp.10531.
- 836 Smeets, C. J. P. P., Duynkerke, P., & Vugts, H. (1999). Observed wind profiles and turbulence fluxes over an ice  
837 surface with changing surface roughness. *Boundary-Layer Meteorology*, 92(1), 99–121.
- 838 Thomsen, L., Stolte, J., Baartman, J., & Starkloff, T. (2014). Soil roughness : comparing old and new methods and  
839 application in a soil erosion model, *Soil*, 1, 399-410. doi:10.5194/soil-1-399-2015
- 840 | Warren, S. G., Brandt, R. E., & O’Rawe Hinton, P. (1998). Effect of surface roughness ~~efon~~ bidirectional  
841 reflectance of Antarctic snow. *Journal of Geophysical Research*, 103(E11), 25789–25807.
- 842 Winkler, M., Juen, I., Mölg, T., Wagnon, P., Gomez, J., & Kaser, G. (2009). Measured and modelled sublimation on  
843 the tropical Glaciar Artesonraju, Peru. *The Cryosphere*, 3(1), 21–30.

844 **Supplementary material**

- 845 • A: GPS position of ground control points at each glacier site  
846 • B: Mesh surface components and processing steps used for Kinect surface scans  
847 • C: Kinect surface meshes for both sites on all dates as .PLY files [sX\_DDMM.PLY]  
848 • D: 3D viewer files of surfaces at site B can be seen at:  
849 <https://sketchfab.com/LindseyNicholson/folders/penitentes-on-glaciar-tapado-chile>

*Table 1: Maximum absolute georeferencing error at each marker stake for site A and B, relative to the standard deviation of the differential GPS measurement.*

|            | $\Delta X$ [mm] | $\Delta Y$ [mm] | $\Delta Z$ [mm] | $\Delta XY$ [mm] | $\Delta XYZ$ [mm] | <i>dGPS XYZ<br/>standard deviation [mm]</i> |
|------------|-----------------|-----------------|-----------------|------------------|-------------------|---------------------------------------------|
| <b>A-1</b> | 63              | 25              | 38              | 68               | 77                | 17                                          |
| <b>A-2</b> | 214             | 118             | 259             | 233              | 312               | 15                                          |
| <b>A-3</b> | 14              | 57              | 53              | 57               | 62                | 14                                          |
| <b>A-4</b> | 23              | 29              | 61              | 33               | 69                | 16                                          |
| <b>A-5</b> | 54              | 32              | 128             | 56               | 139               | 18                                          |
| <b>B-1</b> | 59              | 46              | 19              | 75               | 77                | 16                                          |
| <b>B-2</b> | 121             | 11              | 102             | 164              | 193               | 17                                          |
| <b>B-3</b> | 11              | 48              | 2               | 49               | 49                | 12                                          |
| <b>B-4</b> | 85              | 37              | 34              | 85               | 92                | 12                                          |



Table 2: Mean meteorological conditions during the measurement intervals: incoming shortwave (*SW in*), albedo ( $\alpha$ ), incoming longwave (*LW in*), windspeed (*u*), wind direction (*dir*), surface temperature computed from measured outgoing longwave radiation (*T surface*), air temperature (*T air*), relative humidity (*RH*), air pressure (*P*) and the distance between the sonic ranger and the glacier surface (*dist*).

|                      | <b>SW in</b>               | <b><math>\alpha</math></b> | <b>LW in</b>         | <b>u</b>             | <b>dir</b> | <b>T surface</b> | <b>T air</b>         | <b>RH</b> | <b>P</b>         | <b>dist</b> |
|----------------------|----------------------------|----------------------------|----------------------|----------------------|------------|------------------|----------------------|-----------|------------------|-------------|
|                      | [W m <sup>-2</sup> ]       | [-]                        | [W m <sup>-2</sup> ] | [m s <sup>-1</sup> ] | [°]        | [°C]             | [°C]                 | [%]       | [hPa]            | [m]         |
| <b>sensor</b>        | <i>Kipp and Zonen CNR1</i> |                            |                      | <i>Young 05103</i>   |            | CNR1             | <i>Vaisala HMP45</i> |           | <i>Setra 278</i> | <i>SR50</i> |
| <b>26/12 - 11/12</b> | 413                        | 0.54                       | 205                  | 3.0                  | 170        | -5.3             | -2.7                 | 32.5      | 442              | 1.62        |
| <b>12/12 - 20/12</b> | 441                        | 0.48                       | 212                  | 2.8                  | 214        | -2.9             | -0.8                 | 41.4      | 448              | 1.96        |
| <b>21/12 - 03/01</b> | 426                        | 0.41                       | 224                  | 3.1                  | 217        | -1.4             | 1.9                  | 39.5      | 456              | 2.56        |

Table 3: Surface roughness ( $z_0$ ) computed according to Munro (1989) on detrended profiles longer than 1.5 m, extracted at 0.10 m intervals from the Kinect surface meshes at site A and B for E-W impinging wind and N-S impinging wind. The number of profiles used for each wind direction is given in parenthesis. The likely displacement of the zero velocity plane ( $d_{top} \pm$  standard deviation), was computed as the mean of  $2/3h$  for all profiles and expressed as a distance from the top of the penitentes. The range of the detrended 3D mesh (3D range) provides a reference for the penetration depth of turbulence.

|               | site A       |                   |      |              |                   |      | site B       |                   |      |              |                   |      |
|---------------|--------------|-------------------|------|--------------|-------------------|------|--------------|-------------------|------|--------------|-------------------|------|
|               | z0 E-W (20)  |                   |      | z0 N-S (33)  |                   |      | z0 E-W (6)   |                   |      | z0 N-S (7)   |                   |      |
|               | mean         | max               | min  | mean         | max               | min  | mean         | max               | min  | mean         | max               | min  |
| <b>25-Nov</b> | 45           | 111               | 11   | 8            | 19                | 3    |              |                   |      |              |                   |      |
| <b>11-Dec</b> | 33           | 68                | 12   | 6            | 13                | 2    | 28           | 41                | 22   | 6            | 9                 | 1    |
| <b>20-Dec</b> | 70           | 146               | 57   | 25           | 67                | 7    | 122          | 156               | 84   | 22           | 47                | 14   |
| <b>03-Jan</b> | 136          | 211               | 71   | 45           | 136               | 11   | 133          | 186               | 101  | 21           | 30                | 12   |
|               | 3D range [m] | d_top +/- std [m] |      | 3D range [m] | d_top +/- std [m] |      | 3D range [m] | d_top +/- std [m] |      | 3D range [m] | d_top +/- std [m] |      |
| <b>25-Nov</b> | 0.41         | 0.27              | 0.06 | 0.41         | 0.34              | 0.02 |              |                   |      |              |                   |      |
| <b>11-Dec</b> | 0.48         | 0.33              | 0.05 | 0.48         | 0.41              | 0.01 | 0.58         | 0.45              | 0.02 | 0.58         | 0.51              | 0.02 |
| <b>20-Dec</b> | 0.76         | 0.58              | 0.03 | 0.76         | 0.61              | 0.04 | 0.98         | 0.76              | 0.02 | 0.98         | 0.84              | 0.04 |
| <b>03-Jan</b> | 1.07         | 0.79              | 0.03 | 1.07         | 0.86              | 0.05 | 1.14         | 0.86              | 0.03 | 1.14         | 0.98              | 0.02 |

Figure 1: Map of Tapado Glacier in the Elqui catchment of the Coquimbo Region of Chile, showing the location of the measured sites and insets of (a) the glacier site layout, showing the location of the horizontal reference (black line) and; (b) the test site, highlighting indicating the boulder (\*) (red star) at which the Kinect scans were compared against TLS, and (c) an example photograph of glacier site B at the time of installation.

Figure 2: (a) Oblique view of the TLS-derived DSM of the test site highlights the patchy coverage of the penitentes obtained by this method. (b) Absolute differences between DSMs of the sample boulder produced using TLS and Kinect.

Figure 3: Shaded DSM meshes of N-S orientated DSMs for the 1.5m x 1.5m subsample at glacier site B on (a) 12.12.2013 (b) 20.12.2013 and (c) 03.01.2013 obtained using the Kinect.

Figure 4: Summary of the DSM properties through time at site A (left) and B (right). (a,b) Surface height distribution as a percentage of total surface area, in local coordinates [m] relative to the position of the northern end of ablation frame (a & b). Inset tables show weighted mean mesh elevation, range, surface area and surface area as a function of the horizontal area of the sampled site. (c,d) Distribution of surface angles as a percentage of total surface area (e & d). (e,f) Aspect distribution as a percentage of total surface area (e & f).

Figure 5: Comparison of surface height through time extracted from the Kinect scan and measured manually along the horizontal reference. Vertical error on the Kinect cross profiles is given by a linear interpolation of total positional error between the bounding stakes. Solid black triangles indicate locations where snowdepth exceeded the length of the 3 m probe.

Figure 56: Representative surface heights computed on detrended surface meshes for site A (solid) and site B (open) over time where h1-h4 refer to representative surface heights computed as range (h1), twice the standard deviation (h2), area weighted mean height above the minimum (h3), and area weighted median above the minimum mesh height (h4).

Figure 67: 3D  $Z_0$  computed for  $10^\circ$  aspect intervals for all detrended DSMs highlighting peak roughness occurs in N-S airflow. Maximum values take h to be the detrended mesh elevation range, and minimum values take h to be twice the standard deviation of the detrended mesh.

Figure 78: Comparison of three-dimensional surface roughness through time, indicating the range of  $Z_0$  computed for all incident wind angles (at  $10^\circ$  intervals). Upper panels show the roughness with no zero level displacement and lower panels show values with a zero displacement offset  $d1 = h$ ;  $d1 = 2/3h$  and  $d3 = 1/3h$ . As before, h1- h4 refer to representative surface heights computed as range, twice the standard deviation, area weighted mean height above the minimum, and area weighted median above the minimum mesh height respectively.

Figure 89: Examples of (a) N-S, and (b) E-W orientated cross sections longer than 1.5 m, sampled at 0.1 m intervals in local coordinates at site B from which effective surface roughness properties were computed using the methods of Munro (1989, 1999). The local coordinates are relative to the NE corner marker of site A (Fig 1).

Figure 910: Wind rose for the whole study period (26 Nov 2013 – 3 Jan 2014).

Figure 10: Comparison of surface height through time extracted from the Kinect scan and measured manually along the horizontal reference. Error ranges on the Kinect cross profiles are given by a linear interpolation of total positional error between the bounding stakes. Solid black triangles indicate locations where snowdepth exceeded the length of the 3 m probe.

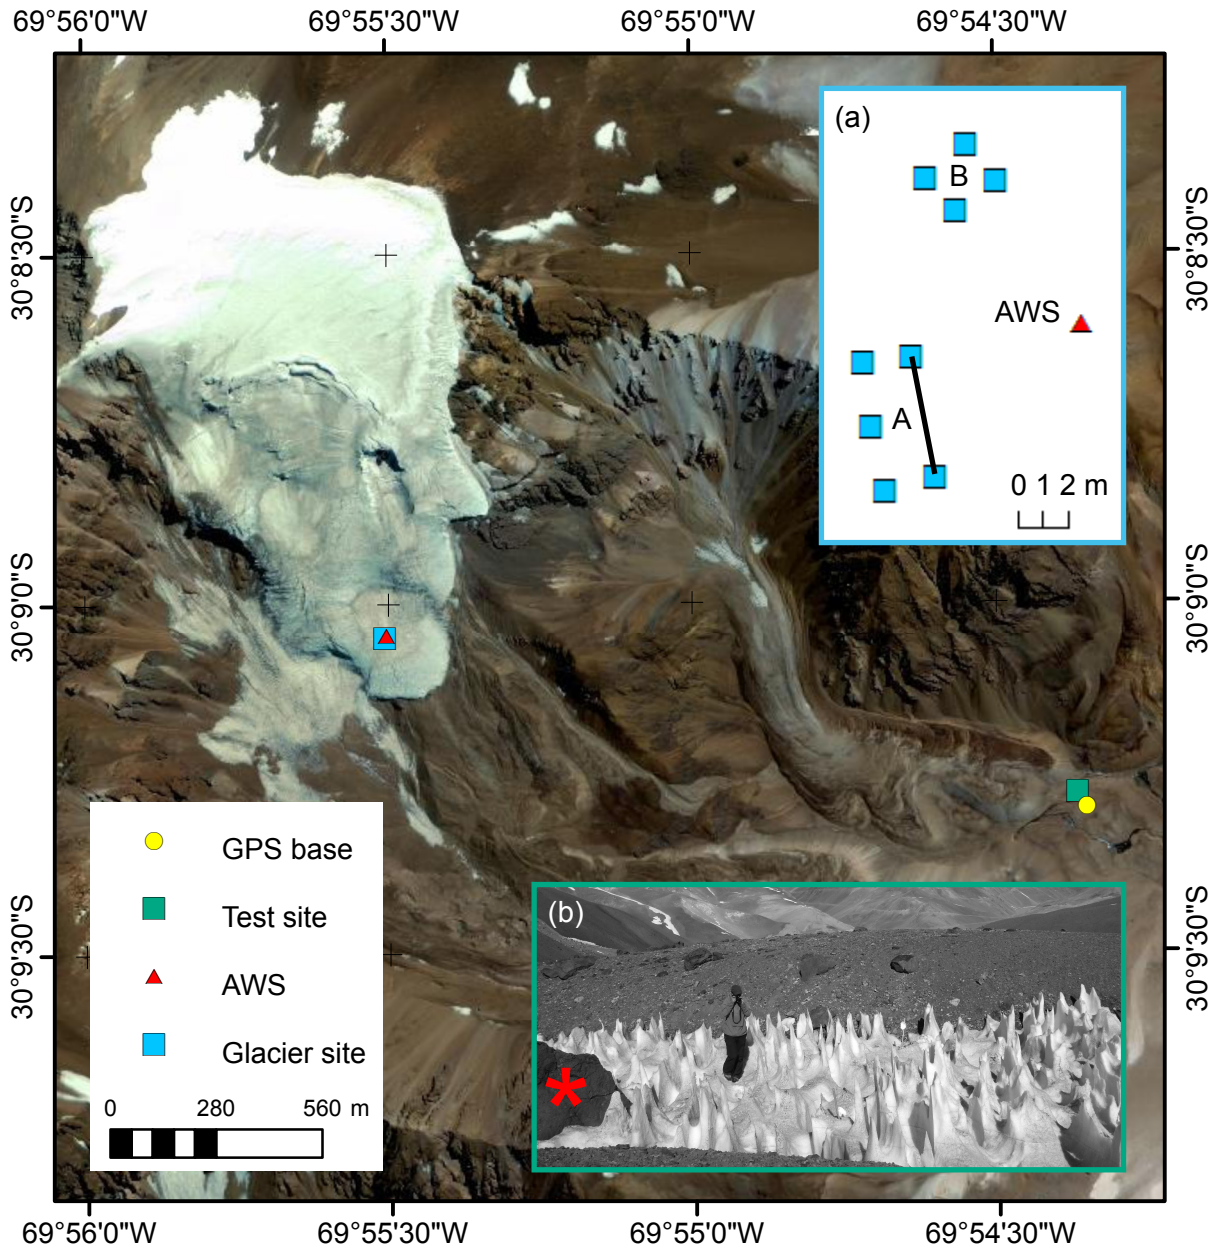

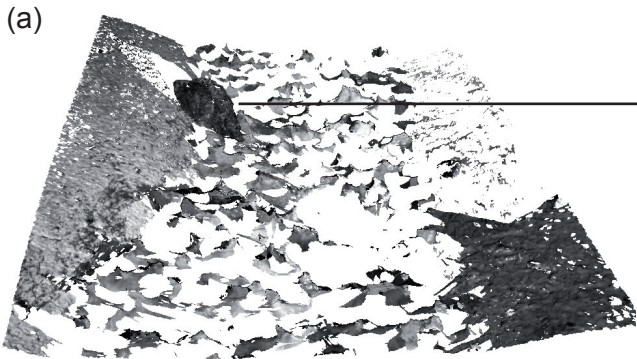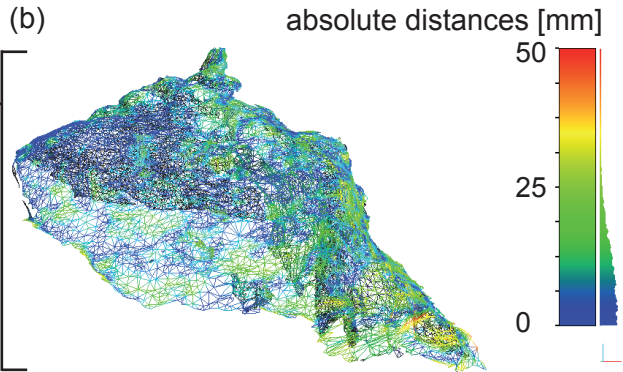

(a)

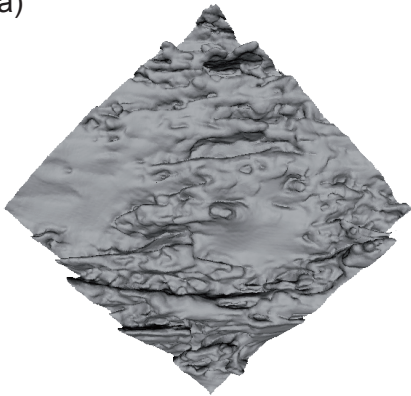

(b)

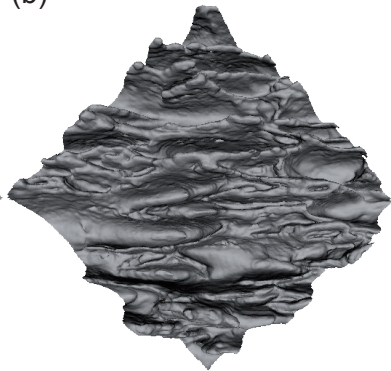

(c)

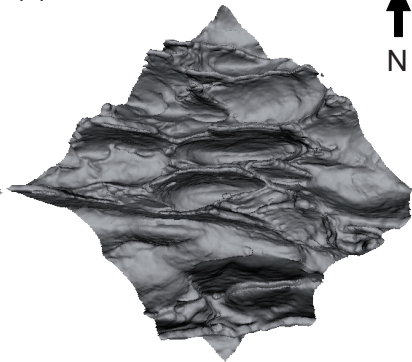



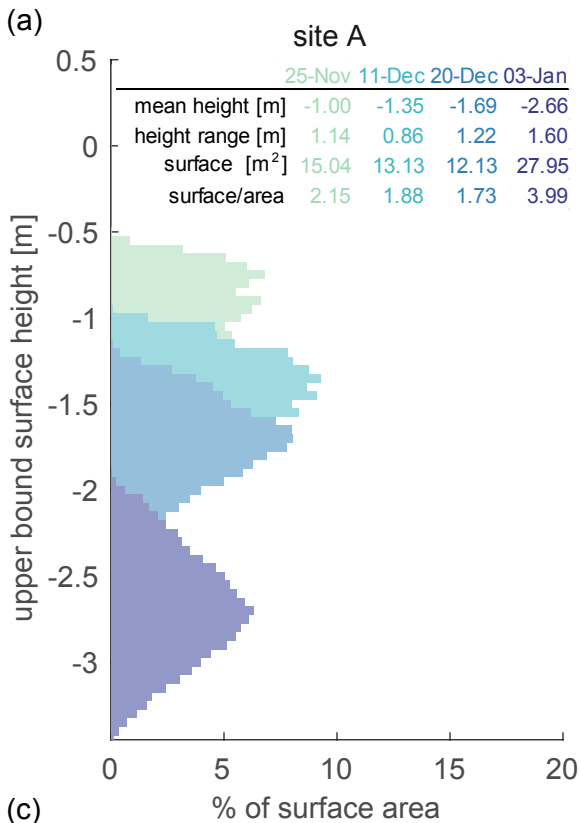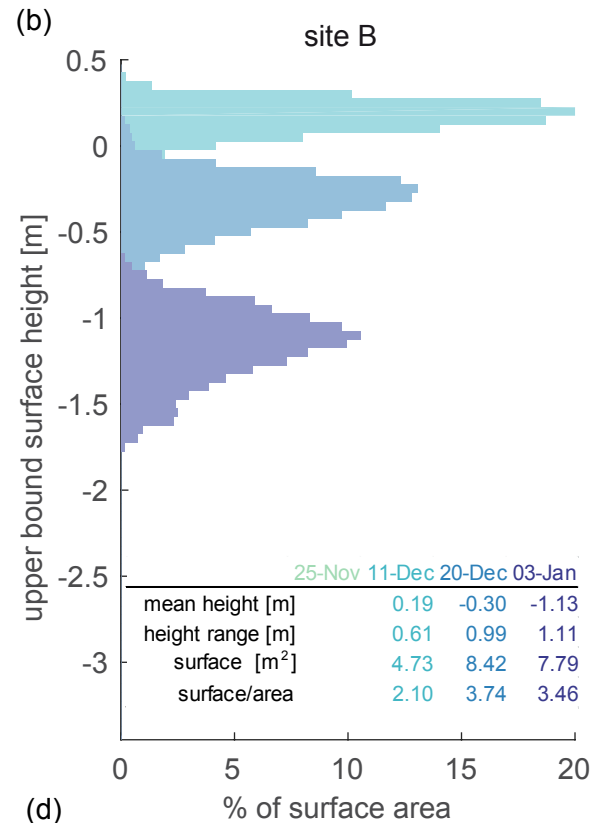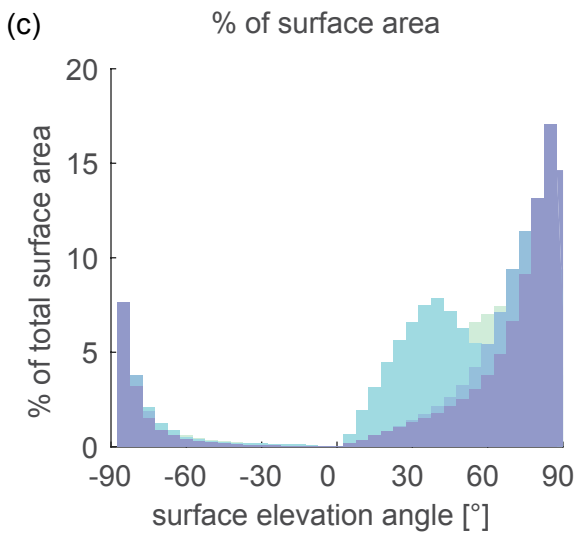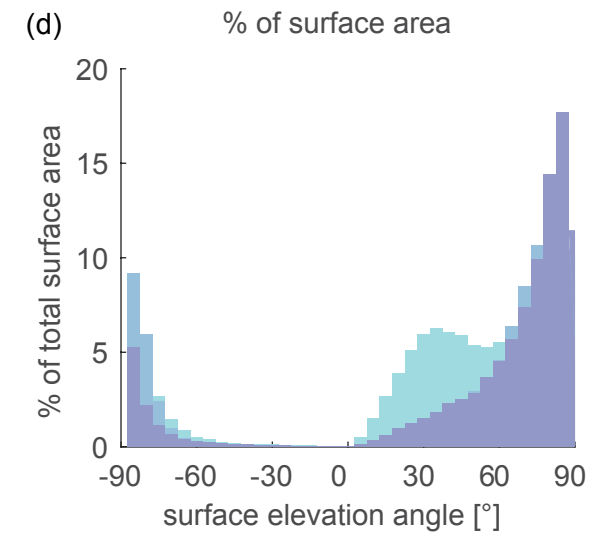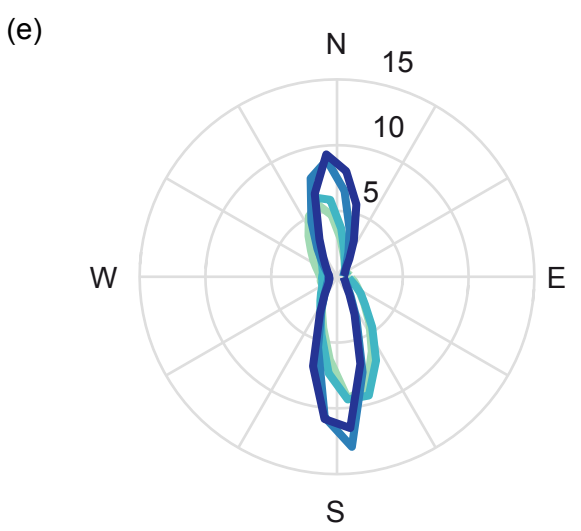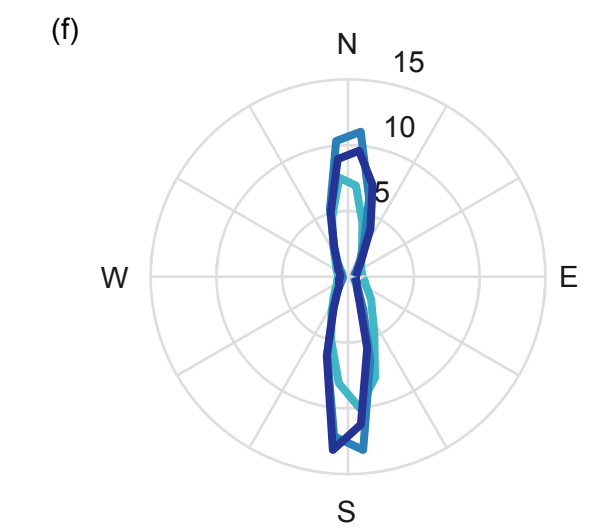

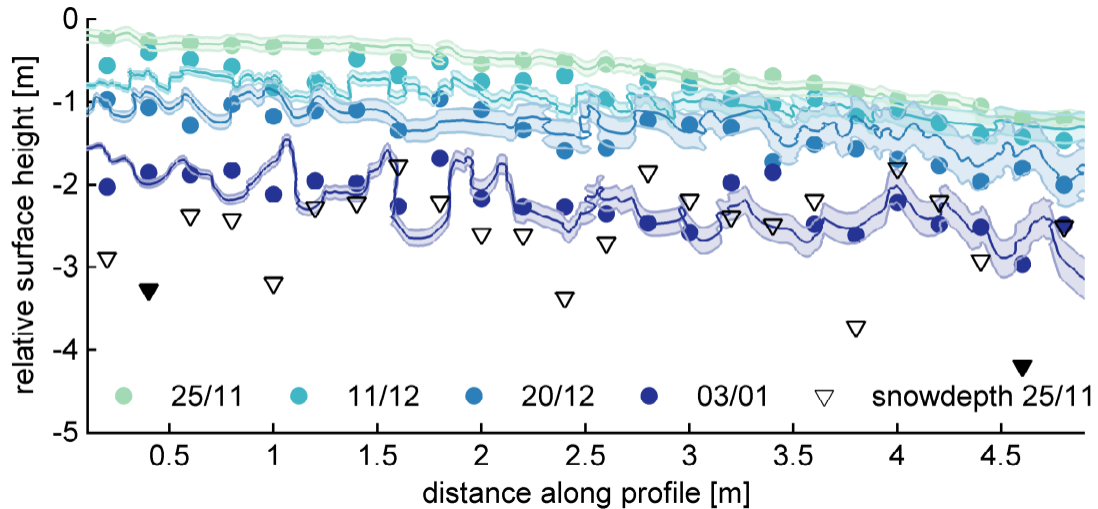

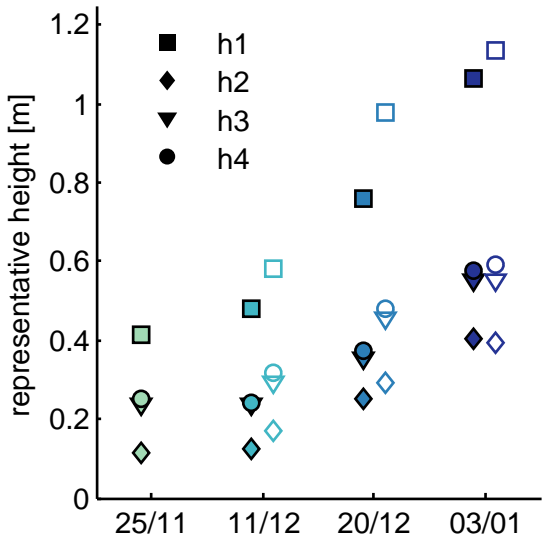

site A

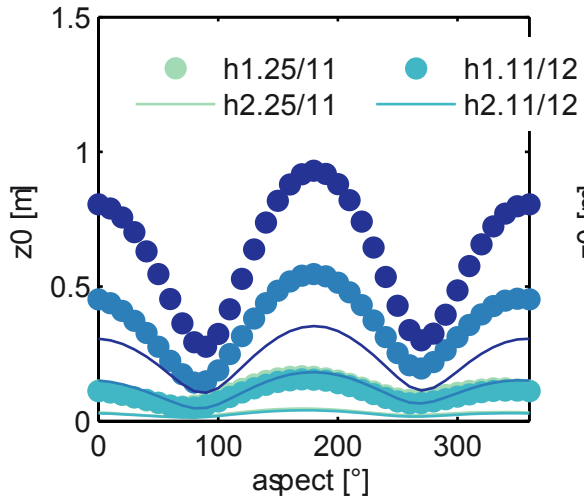

site B

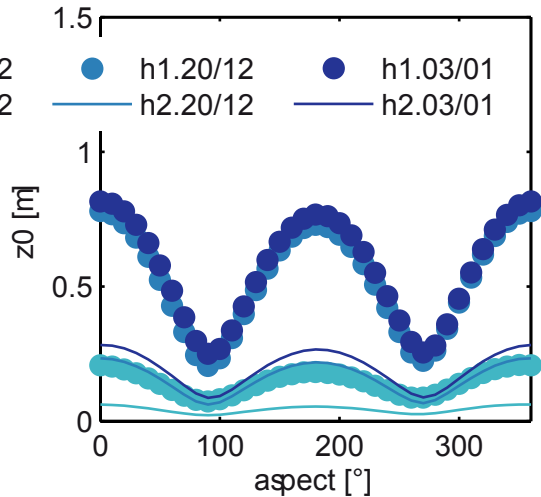

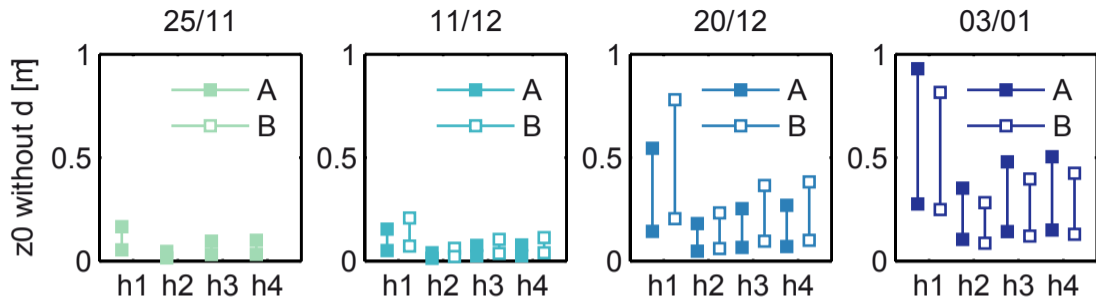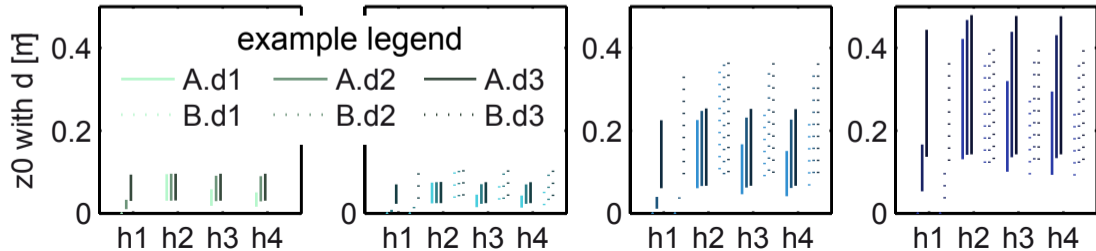

N-S sections >1.5m

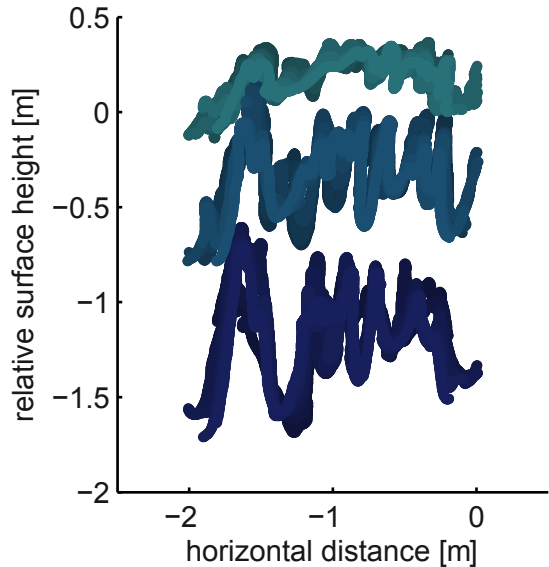

E-W sections > 1.5m

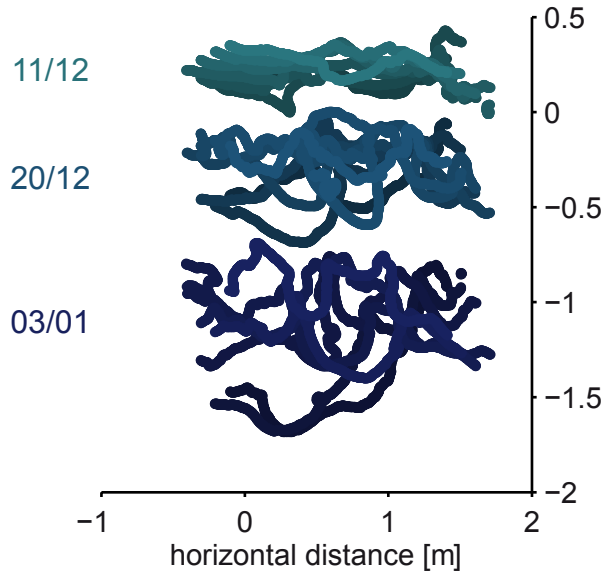



26.11.13 – 03.01.2014

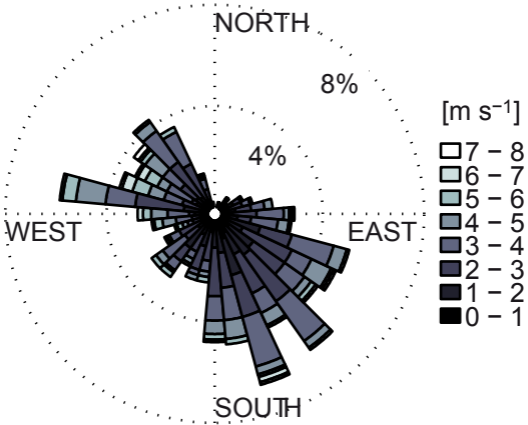

*A: GPS positions of the base of the marker stakes for sites A and B in UTM region 19S, using the WGS84 datum and ww15mgh geoid, showing combined XY, and XYZ standard deviations (std) are less than 2 cm for all stakes.*

|             | <b>easting</b> | <b>std easting</b> | <b>northing</b> | <b>std northing</b> | <b>elevation</b> | <b>std elevation</b> | <b>XY std [mm]</b> | <b>XYZ std [mm]</b> |
|-------------|----------------|--------------------|-----------------|---------------------|------------------|----------------------|--------------------|---------------------|
| <b>SA-1</b> | 410909.704     | 0.004              | 6664147.933     | 0.007               | 4774.568         | 0.015                | 8                  | 17                  |
| <b>SA-2</b> | 410910.615     | 0.006              | 6664143.153     | 0.011               | 4773.496         | 0.008                | 13                 | 15                  |
| <b>SA-3</b> | 410908.618     | 0.004              | 6664142.623     | 0.004               | 4773.375         | 0.013                | 6                  | 14                  |
| <b>SA-4</b> | 410907.751     | 0.004              | 6664147.731     | 0.003               | 4774.518         | 0.015                | 5                  | 16                  |
| <b>SA-5</b> | 410908.046     | 0.004              | 6664145.189     | 0.003               | 4773.988         | 0.017                | 5                  | 18                  |
| <b>SB-1</b> | 410911.808     | 0.005              | 6664156.396     | 0.007               | 4775.352         | 0.014                | 9                  | 16                  |
| <b>SB-2</b> | 410913.034     | 0.004              | 6664154.925     | 0.011               | 4775.278         | 0.012                | 12                 | 17                  |
| <b>SB-3</b> | 410911.426     | 0.003              | 6664153.732     | 0.003               | 4775.314         | 0.011                | 4                  | 12                  |
| <b>SB-4</b> | 410910.228     | 0.003              | 6664155.065     | 0.004               | 4775.464         | 0.011                | 5                  | 12                  |

*B1: Information on the mesh components and alignment errors for each scanned surface at both glacier sites.*

|                                            | Site A |        |        |        | Site B |        |        |
|--------------------------------------------|--------|--------|--------|--------|--------|--------|--------|
|                                            | 25-Nov | 11-Dec | 20-Dec | 03-Jan | 11-Dec | 20-Dec | 03-Jan |
| <b># of meshes used</b>                    | 13     | 10     | 13     | 10     | 6      | 6      | 3      |
| <b># of arcs used<br/>(potential arcs)</b> | 16(28) | 16(21) | 17(28) | 11(19) | 9      | 11     | 5      |
| <b>mean error [mm]</b>                     | 2.396  | 2.632  | 2.995  | 3.171  | 2.524  | 3.241  | 3.484  |
| <b>median error [mm]</b>                   | 2.172  | 2.541  | 3.112  | 2.945  | 2.414  | 3.310  | 3.285  |
| <b>90th % error [mm]</b>                   | 3.186  | 3.541  | 3.567  | 3.836  | 2.784  | 3.781  | 3.386  |

*B2: Detailed mesh-processing procedure used in this study.*

- All processing was carried out in Meshlab unless otherwise stated
- Pairwise point alignment of the component surface meshes covering each study site
- Applied filter to remove mesh sections (vertices and faces) consisting of < XXX vertices
- Applied filter to remove unreferenced and duplicated vertices
- ICP alignment optimization of the mosaicked component surface meshes using the following parameters:
  - sample number of 1000 for each ICP iteration
  - minimal starting distance for chosen points of 10 mm at the first iteration reducing by 20% on each iteration
  - maximum of 50 iterations were performed
  - using rigid matching so that no stretching or warping of the mesh is permitted
  - export distributed alignment error
- Flattened mosaicked surface meshes into a single layer and remeshed using a Poisson filter with the following parameters:
  - Octree depth (12)
  - Solver divide (7)
  - number of samples per node (1)
- Meshes were georeferenced with differential GPS measurements in Polywork
- Corner marker stakes, and parts of the mesh representing sensors installed within the sample site were manually removed from the georeferenced surface mesh and the mesh was cropped at the margins
- Triangle numbers were reduced by merging vertices closer than 2.5mm
- Resultant non-manifold features were removed
- Closed holes using a 20mm diameter filter. Inspected boundaries of resultant meshes to confirm that all remaining boundaries are on the edges of the sub-sampled area.
- Cropped horizontal areas to a consistent patch size: A 2 x 3.5m; B 1.5 x 1.5m
- Exported as .OBJ file from which the vertex coordinates and face indices and metadata were extracted for subsequent analysis in Matlab.

*C: Comments and recommendations on the Kinect sampling strategy used in this study.*

- Daylight swamps the signal of the Kinect. Over rock surfaces the Kinect worked perfectly as long as the surface was not in direct sunlight. Over snow and ice the effective range was reduced to about 1m and scanning could only be performed once the sun was below the horizon and was even better after darkness had fallen.
- This study used ReconstructMe as the capture software as it performs real time meshing so that the quality of the surface collected can be assessed at the time of capture. This is an advantage for:
  - observing if return signals had been obtained from the troughs of the penitentes as penetration into very narrow penitente troughs was only achieved over several passes and by re-orientating the sensor to be parallel with the trough.
- The disadvantages of ReconstructMe are that:
  - it does not save the raw depth data
  - it requires a computer with a powerful graphics processor as the real time processing is performed at the same 30Hz frequency as the depth-map frame production of the Kinect.
  - the powerful graphics processor tends to be power hungry
- Alternative systems for sampling Kinect data are numerous and growing, and the user must do some up to date research to discover the newest developments, but some existing options are to:
  - use the 'KinectFusion' algorithm (Izadi et al., 2011;Newcombe et al., 2011), implemented in the 'KinFu' program (part of the Point Cloud Library (PCL); Rusu and Cousins, 2011), which allows one to move the Kinect and scan an area or object, automatically stitching together each frame into one large 3D model, while also capturing raw data.
  - for very large areas, the KinFu implementation has been extended, named Kintinuous, and used to map paths more than 100m long (Whelan et al., 2012).
- When covering an area larger than 1m<sup>2</sup> with a Kinect survey it would be advantageous to have a camera boom mounting for moving the Kinect smoothly over the glacier surface, as this would mean larger areas can be scanned in a single mesh. This would save significant work, and additional error involved in aligning and mosaicking the meshes.
- Ground control point markers which have fixed geometric surfaces with known alignment to x, y, z would have facilitated the alignment and mosaicking the component meshes of each scan. On the basis of this study a marker pole with cubes attached to it at fixed heights and known orientations would be ideal. As the surface lowers and more of the marker stake is revealed additional markers should be added at known distances below the previous marker cube.
- A higher number of ground control points to provide redundancy is advisable as in the case of poorly represented locations for georeferencing step, these could be excluded and the remaining points would still allow successful georeferencing.
